# Supplementary material for: Tumor Suppression of Ras GTPase-Activating Protein RASA5 through Antagonizing Ras Signaling Perturbation in Carcinomas
Source: PubMed Central journal article supplement — iScience. 2019 Oct 8;21:1–18. doi: 10.1016/j.isci.2019.10.007 (PMC6820368; doi:10.1016/j.isci.2019.10.007), 2019-10-08
Supplement: mmc1.pdf [file mmc1.pdf]

**ISCI, Volume 21**

**Supplemental Information**

**Tumor Suppression of Ras GTPase-Activating**

**Protein RASA5 through Antagonizing Ras**

**Signaling Perturbation in Carcinomas**

**Lili Li, Yichao Fan, Xin Huang, Jie Luo, Lan Zhong, Xing-sheng Shu, Li Lu, Tingxiu Xiang, Anthony T.C. Chan, Winnie Yeo, Ceshi Chen, Wai Yee Chan, Richard L. Haganir, and Qian Tao**

## **Supplementary Information**

### **Transparent Methods**

#### **Array-Comparative Genomic Hybridization (aCGH)**

Whole-genome arrays of 1-Mb resolution with 3,040 BAC/PAC clones were kindly provided by Dr C. Langford at the Wellcome Trust Sanger Institute, Cambridge, UK (<http://www.sanger.ac.uk/Projects/Microarrays/>), with clone details listed in Ensembl database ([www.ensembl.org/Homo\\_sapiens/index.html](http://www.ensembl.org/Homo_sapiens/index.html)). Array CGH was performed as described previously (Ying et al., 2006).

#### **Cell lines, tumor samples and drug treatments**

Multiple carcinoma cell lines and immortalized normal epithelial cell lines were purchased from ATCC and cultured under standard conditions. Human normal adult tissue RNA samples were purchased commercially. Archived DNA samples of paired Chinese ESCC (T) and adjacent surgical marginal tissues (N), NPC, normal nasopharynx and esophagus tissues, breast cancer tissues, and normal breast tissues were used (Jin et al., 2007).

For Aza treatment, cells were seeded at a density of  $1 \times 10^5$  cells/ml and incubated overnight. Medium was then replaced with fresh medium containing Aza (Sigma-Aldrich, St Louis, MO) at a final concentration of 5-10  $\mu$ M. Cells were allowed to grow for 72 h, with changing of Aza-containing medium every 24 h. For combined treatment of Aza with TSA, cells were treated with TSA (100 ng/ml in DMSO) for additional 24 h after Aza treatment. MEK inhibitor PD98059 (Sigma-Aldrich, St Louis, MO) was dissolved in dimethyl sulfoxide (DMSO) to reach a concentration of 20  $\mu$ M for cell treatment. MEK inhibitor U0126 (Cell Signaling, #9903) was dissolved in DMSO to reach a concentration of 10  $\mu$ M for cell treatment.

#### **RNA extraction and semi-quantitative RT-PCR**

Total RNA was extracted using TRI Reagent (Molecular Research Center, Inc., Cincinnati, OH). cDNA products were amplified with Go-Taq polymerase for 32 cycles (Promega, Madison, WI), with *GAPDH* as a control for RNA integrity. The sequences of primer sets and reaction systems was listed in Table S3, S4.

#### **Bisulfite treatment and promoter methylation analysis**

Bisulfite modification of DNA, MSP and BGS were carried out as previously described (Jin et al., 2007). The sequences of primer sets used for MSP and BGS were listed in Table S3. MSP was performed for 40 cycles using AmpliTaq Gold (Applied Biosystem, Foster City, CA). For BGS, amplified fragments were TA-cloned into PCR4-Topo vector (Invitrogen, CA) with 6-8 colonies randomly chosen and sequenced.

### **Construction of plasmids and mutagenesis**

Primer sequences for cloning PCR were listed in Table S3. AccuPrime™ Taq DNA Polymerase was used for all PCR reactions. Full-length open reading frame (ORF) sequence of *RASA5* was cloned from the adult brain cDNA library by PCR with a Flag-tag attached to the N-terminus. The product was then digested and ligated into the BamHI/XbaI site of pEGFP-C1 (Clontech) or pcDNA3.1 expression vector (Invitrogen, CA).

Three truncated variants: *RASA5*<sup>ΔGAP</sup> with deletion of GAP-G domain (aa 392-729), GAP-L domain (aa 373-1343) and *RASA5*<sup>ΔC2-GAP</sup> deficient of C2-GAP tandem (aa 259-1343) were generated by site-directed PCR with pcDNA3.1-Flag-*RASA5* plasmid as the template. Sequences of each insert were confirmed by sequencing.

For *RASA5* silencing, cells were transfected with two different siRNAs targeting *RASA5* and scrambled control siRNAs using Lipofectamine 3000 (Invitrogen, CA) according to the manufacturer's instruction. siRNA *RASA5*-1 was from Invitrogen: Stealth RNAi for *RASA5* (Cat#: HSS113025) (UUA CAU AGA ACA GGU CUU UAC CAC C) with a Stealth RNAi negative control; siRNA *RASA5*-2 was purchased from OriGene (Cat#: SR305827).

### **Immunofluorescence assay**

Cells were transfected with indicated plasmids using Lipofectamine™ 3000 reagent (Invitrogen). 24 h after transfection, cells were fixed in 4% paraformaldehyde in PBS and permeabilized with Triton X-100 at room temperature (RT). Cells were incubated with primary antibodies at 4 °C overnight. After three washes with PBS, rhodamine- or FITC, or Alexa Fluor® 488, or Alexa Fluor® 555-conjugated secondary antibodies were added and incubated for 1 h. Nuclear counterstaining was performed with 4',6-diamidino-2-phenylindole (DAPI) (Calbiochem, San Diego, CA). Coverslips

were mounted in DABCO and subjected to analyze with fluorescence microscope (Olympus, Japan). Antibodies used were listed in Table S5.

### **Colony formation assay**

For monolayer colony formation assay, cells were plated in a 12-well plate ( $2 \times 10^5$  cells/well). After overnight culture, cells were transfected with either RASA5-expressing plasmids or empty vectors, using Lipofectamine 3000 (Invitrogen, CA). 48 h after transfection, cells were replated with an appropriate density in 6-well plates with G418 (0.4 - 1.2 mg/ml) selection for 7-12 days. BT549 and T47D cells were plated for colony formation assay, and then transfected with RASA5 siRNAs or control siRNAs, and treated with the indicated inhibitors 20  $\mu$ M PD98059 and 10  $\mu$ M U0126. The culture medium with siRNAs and MEK inhibitors were incubated for an additional 10-14 days, changed with fresh medium containing siRNAs and MEK inhibitors every three days. Surviving colonies ( $\geq 50$  cells per colony) were visualized with Gentian Violet staining (ICM Pharma, Singapore) and manually counted.

For colony formation assay in soft agar, transfections were undertaken as in monolayer colony formation assay. 48 h post-transfection, cells were resuspended in full medium containing 0.4 mg/ml G418 and 0.3% soft agar, and then seeded at a density of  $4 \times 10^3$  cells into a 24-well plate. Colonies ( $>50$  cells) were counted and photographed after 10-20 days. All the experiments were performed in triplicate wells and repeated for three times independently.

### **Protein preparation and Western blot**

Cells were transfected as described above. 48 h post-transfection, cells were lysed in RIPA buffer. A total of 50  $\mu$ g of protein extracts were separated by SDS-PAGE and transferred to Nitrocellulose membranes. After probed with primary antibodies, the membrane was incubated with secondary antibodies and was visualized using the ECL detection system (GE Healthcare). Antibodies used were listed in Table S5. All the images were cropped around the known molecular weight of the interested band and representative blots were shown. Each blot repeated independently three times with similar results. Image J was used to quantify blots and the quantitative data presented by the graph, with error bars and significance calculations.

### **Luciferase assay**

Cells were transfected with a plasmid either empty or expressing RASA5, along with SRE-luc and Renilla luciferase plasmid (pRL-SV40). Cell lysate was assayed for determining the firefly and Renilla luciferase activities in succession using a Dual Luciferase kit (Promega, Madison, WI). Luciferase activity of firefly was normalized against that of Renilla. Each assay was performed in triplicate and repeated for three times.

### **Wound healing assay**

Cells grown on 12-well plates were carefully wounded using a sterile pipette tip, washed once with fresh medium, and then supplemented with fresh medium. After incubation for 24 h and 48 h, wound closure was monitored under a phase contrast microscope. Each assay was performed in triplicate and all experiments were repeated for three times.

### **Matrigel invasion assay**

In vitro Matrigel invasion assays were performed with BD BioCoat Matrigel Invasion Chambers (Transwell) (BD Biosciences, Heidelberg) in 24-well plates. Briefly, transfected cells were resuspended in serum-free medium at a density of  $2.5 \times 10^4$  cells/ml. The GFR Matrigel inserts were rehydrated by incubating with 0.5ml warm culture medium for 2 hours, and then 0.5 ml of cell suspension was added to the inserts. Full medium with 10% serum was added to the bottom chamber as a chemoattractant. After incubation for 24 h at 37°C, cells were fixed and stained with Gentian Violet. Data represented the results of three independent experiments.

### **Ras activity assay**

Active levels of Ras-GTP were determined by affinity precipitation using GST-Raf-RBD (Upstate Biotechnology, Inc., NY), a GST fusion protein containing the Raf/Ras-binding domain. Cells were transfected with pcDNA3.1-Flag-RASA5 plasmid or empty vector, together with or without an oncogenic active form of H-Ras cDNA (Q61L mutant) in pUSEamp (Upstate Biotechnology, Inc., NY), using Lipofectamine 2000 (Invitrogen, CA). 48 h after transfection, cells were incubated in medium containing 10% serum for 5 minutes following overnight serum starvation. Then cells were lysed and incubated with 10ul of Raf-1 RBD agarose for 30 minutes at 4°C with gentle rocking. Agarose beads were collected by pulsing and bound proteins were eluted with

SDS/PAGE sample buffer, resolved on 12% acrylamide gels, and subjected to Western blot analysis with specific Ras antibody.

### **Statistical analysis**

All statistical analyses were performed in excel and using SPSS version 21.0. All data were generated from at least three independent experiments and represented as means  $\pm$  SEM. Gene expression data were analyzed using log<sub>2</sub> transformed and normalized. Log-rank test was used to compare the survival distributions of cancer patient groups with different levels of *RASA5* expression or methylation.  $\beta$ -value ranging from 0 to 1 was a measure of DNA methylation level for completely unmethylated to completely methylated. The Spearman correlation coefficient between *RASA5* methylation and gene expression were calculated in excel. Overall survival curves were plotted using Kaplan-Meier analysis. Unpaired Student's t-test was used to compare two experiment groups and 1-way ANOVA (with Newman-Keuls post-hoc test) was used to compare groups of three or more. When  $p < 0.05$ , data were considered to be statistically significant for all experiments.

## **Supplementary figure legends**

**Figure S1. Identification of RASA5 as a target of the 6p21.3 deletion, related to Figure 1.** (A) Representative results of 1-Mb array-CGH of CNE2 and 5-8F carcinoma cell lines. Normalized log<sub>2</sub> signal intensity ratios from -1 to 1 are plotted. Each single BAC clone is represented by a dark blue colored dot. The BAC clone containing the RASA5 locus (bA175A4) is labeled with the red dot, and also indicated by red rectangle in the top cytoband of Chr. 6p. Middle panel, the 6p21.31-6p21.32 gene-rich region shown as in Ensembl Genome Browser ([www.ensembl.org/index.html](http://www.ensembl.org/index.html)), with the RASA5 gene highlighted by red rectangle. (B) Expression pattern of all candidate genes within 6p21.31-6p21.32 in representative tumor cell lines by semi-quantitative RT-PCR, with 3 normal tissues (testis, larynx and esophagus) used as controls. ESCC, esophageal squamous cell carcinoma; NPC, nasopharyngeal carcinoma.

**Figure S2. Analysis of RASA5 expression in human tissues, related to Figure 1 and Figure 2.** (A) RASA5 mRNA expression in normal human tissues from GTEx, BioGPS, and CGAP SAGE databases. (B) Bar graph illustrating RASA5 expression levels by IHC in human normal tissues. Data were retrieved from Human Protein Atlas database (<http://proteatlas.org>, version 17). N, not detected; L, low; M, medium; H, high. (C) RASA5 protein expression in normal tissues and tumor cell lines by Western blot using anti-RASA5 (Ab2).

**Figure S3. RASA5 promoter is frequently methylated in primary carcinomas, related to Figure 2.** (A) RASA5 was downregulated and methylated in carcinoma cell lines, detected by semi-quantitative RT-PCR and MSP, but expressed in immortalized non-transformed normal epithelial cell lines (with names green underlined). M, methylated; U, unmethylated; Ca, cancer; CRC, colon cancer. (B) Expression pattern of RASA family members in cancer cell lines as examined by semi-quantitative RT-PCR. *GAPDH* has been used as an internal control for RNA integrity (not shown here). Ca, cancer; CRC, colon cancer. (C, D, E) Representative MSP analyses of RASA5

promoter methylation in primary carcinomas. (F) BGS results confirmed the dense methylation of RASA5 in primary NPC and ESCC tumor samples but not in normal tissue samples. M, methylated; U, unmethylated. N, paired tumor-adjacent normal tissues; T, tumor.

**Figure S4. RASA5 reconstitution triggers tumor cell apoptosis and suppresses Ras signaling as a RasGAP, related to Figure 3-6.**

(A) Re-expression of RASA5 induced the activation of caspase-3. HNE1 and KYSE150 carcinoma cells were co-transfected with EGFP-caspase-3-sensor reporter plasmid, together with either RASA5-expressing or empty vector and inspected 48 hours after co-transfection. Original magnification, 400x (upper), 100x (lower). Scale bar 200  $\mu$ m. (B) Quantitative analyses of caspase-3-activated cells. Data were mean  $\pm$  SEM (N=3), asterisk indicated  $p < 0.05$ . (C) Assessed by dual-luciferase reporter system. Ectopic expression of RASA5 in both HEK293 and KYSE150 cell lines significantly downregulated activities of TOPFlash and AP-1-Luc. Data were presented as mean  $\pm$  SEM of three independent experiments via Student's t test and representative data were shown. \*,  $p < 0.05$ . (D) Altered subcellular localizations of p-ERK1/2 in HONE1 carcinoma cells with RASA5 re-expression. HONE1 cells were transfected with RASA5-construct or empty vector and immunolabeled for p-ERK1/2 (red). Original magnification, 400x. (E) Nuclear translocation of p-ERK1/2 in T47D cells depleted of RASA5 expression. T47D cells were transfected with control or RASA5 siRNA, and then immunolabeled for p-ERK1/2 (red). DAPI counterstaining (blue) represented cell nuclei. Original magnification, 400x. Scale bar 200  $\mu$ m.

**Figure S5. Knockdown of RASA5 enhances ERK phosphorylation levels, related to Figure 6.**

Graphs represent quantification of the phosphor-immunoblots normalized to corresponding total protein levels by Western blot in T47D and BT549 cells. Data were presented as mean  $\pm$  SEM of three independent experiments via Student's t test. \*,  $p < 0.05$ ; \*\*,  $p < 0.01$ .

**Figure S6. The RASA5 protein sequence is evolutionarily well conserved among**



**different species, related to Figure 7.** RASA5 amino acid sequences from different species (Homo sapiens, Bos Taurus, Rattus norvegicus, and Xenopus (Silurana) tropicalis) were compared and aligned using ClustalX (<http://www.clustal.org/clustal2/>). The only major difference in its C-terminal tail is emphasized with a red rectangle.

**Figure S7. RASA5 inhibits the migration and F-actin stress fiber formation of carcinoma cells, related to Figure 8-9.** (A) Wound healing assay showed reduced wound closure rate in RASA5-expressing cells compared to controls 24 hours after scratch wound made on confluent cell monolayer. Dash lines indicated wound edge. (B) Knockdown of RASA5 induced morphology change of T47D carcinoma cells from cobblestone-like to spindle-like. Original magnification, 400x. Scale bar 200  $\mu\text{m}$ . (C) HONE1 and MB231 cells were transiently transfected with RASA5-EGFP construct or empty vector and subjected to immunofluorescence staining of F-actin stress fiber with Phalloidin (red). Arrows indicated EGFP+ cells. DAPI counterstaining (blue) represented cell nuclei. Original magnification, 400x. Scale bar 200  $\mu\text{m}$ . (D) Immunofluorescence staining showed that RASA5 is located in cell-cell interaction regions and actin tails under the fluorescence microscope. Left, FITC green fluorescence of Flag-tagged RASA5; middle, DAPI-stained cell nuclei; right, merged images. Original magnification, 400x. Scale bar 200  $\mu\text{m}$ .

**A**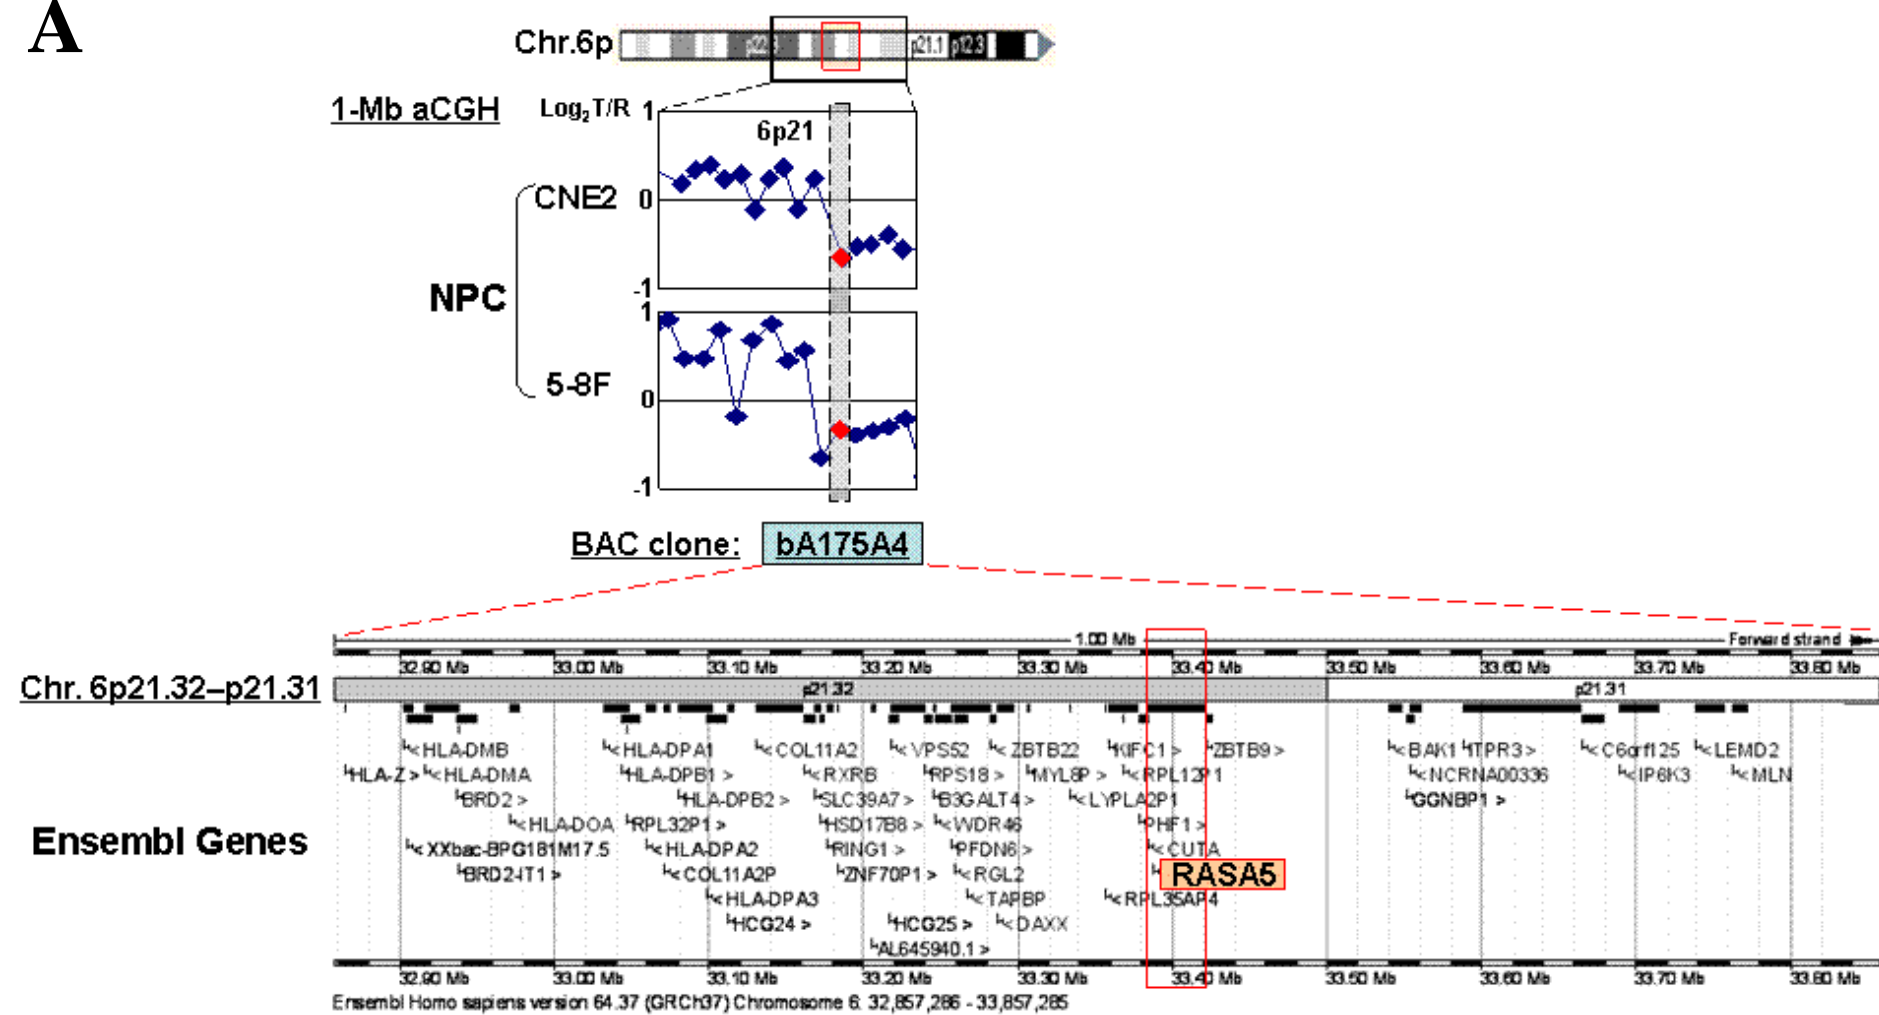**B**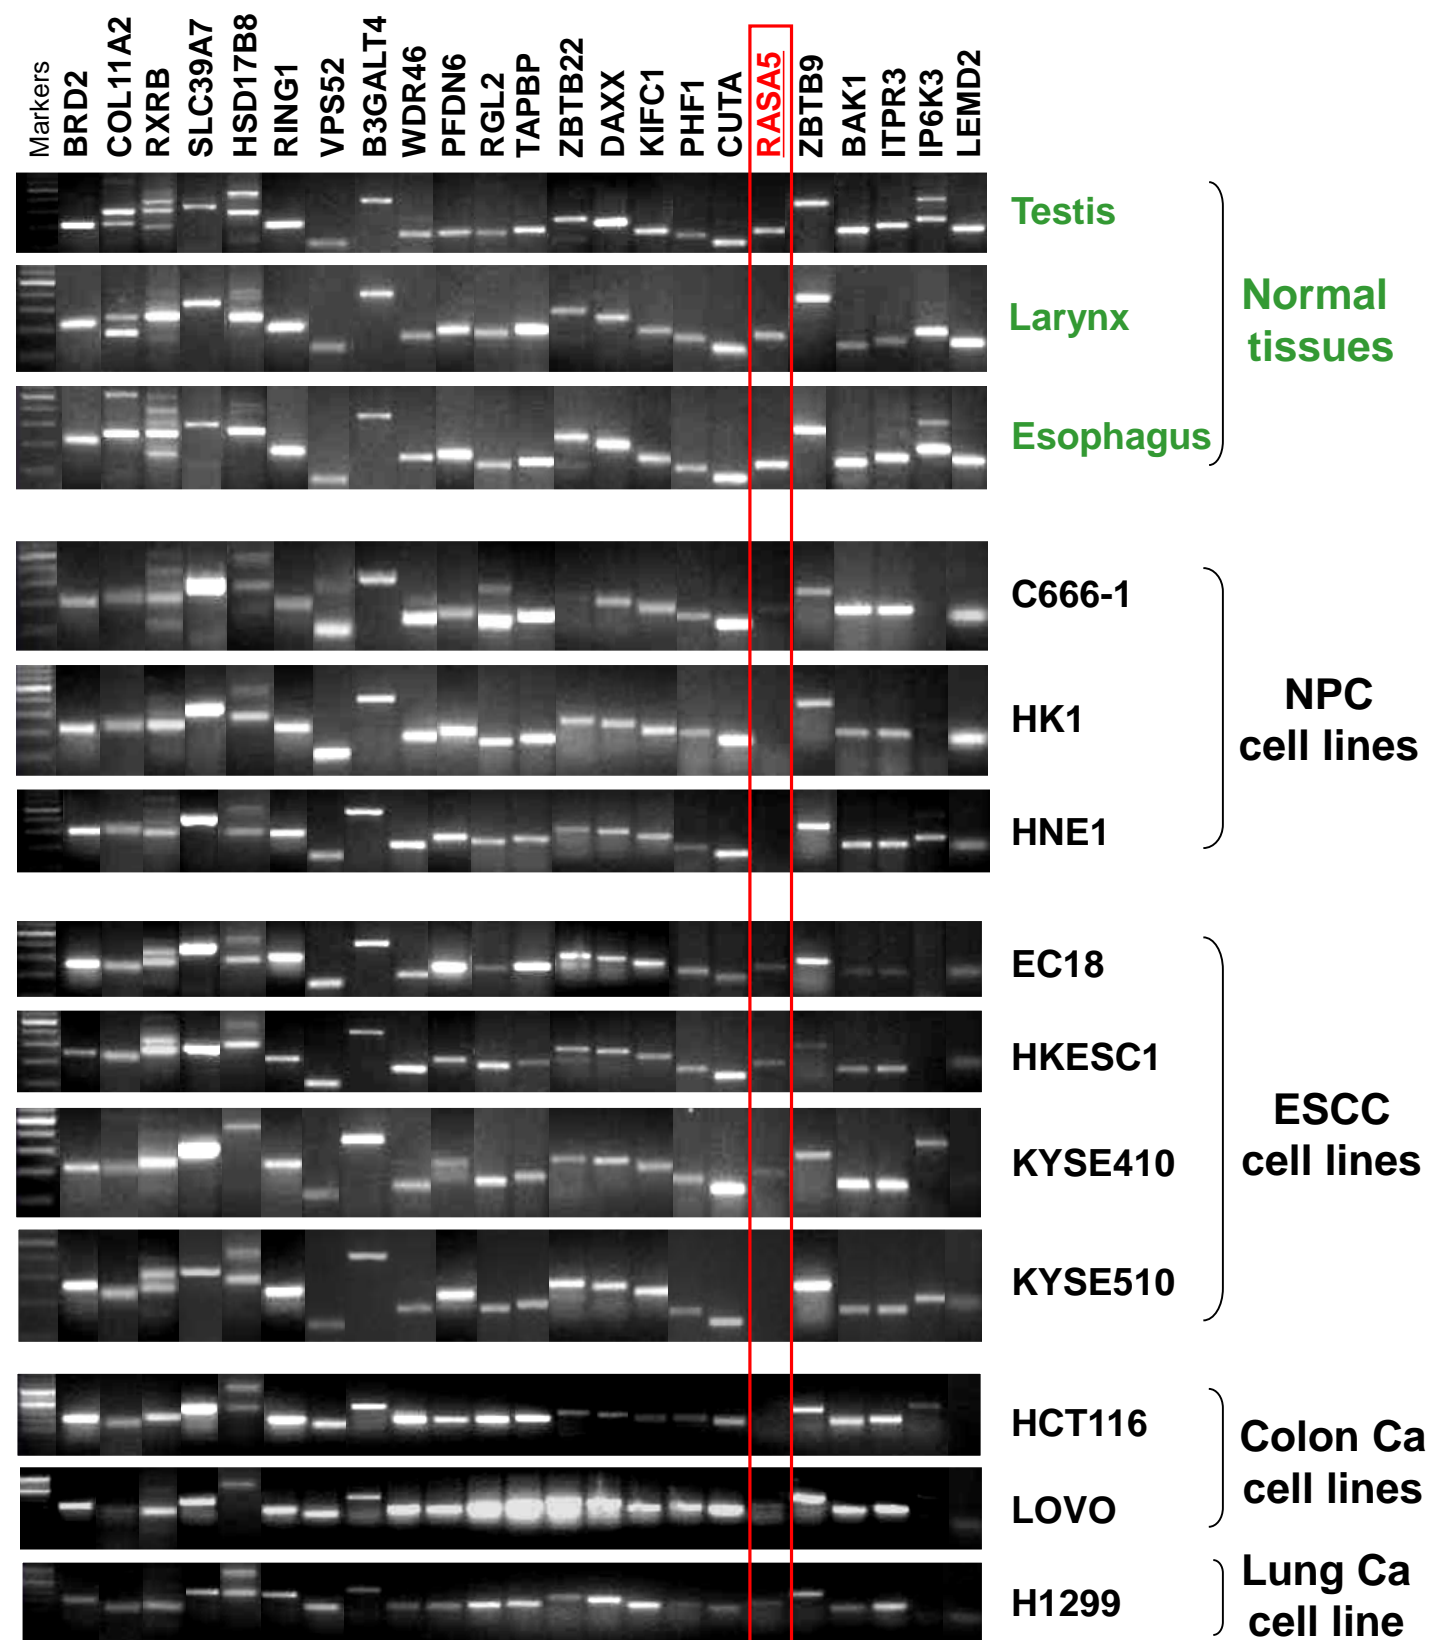

### A *RASA5* RNA expression in multiple normal tissues (from GeneCards human gene database)

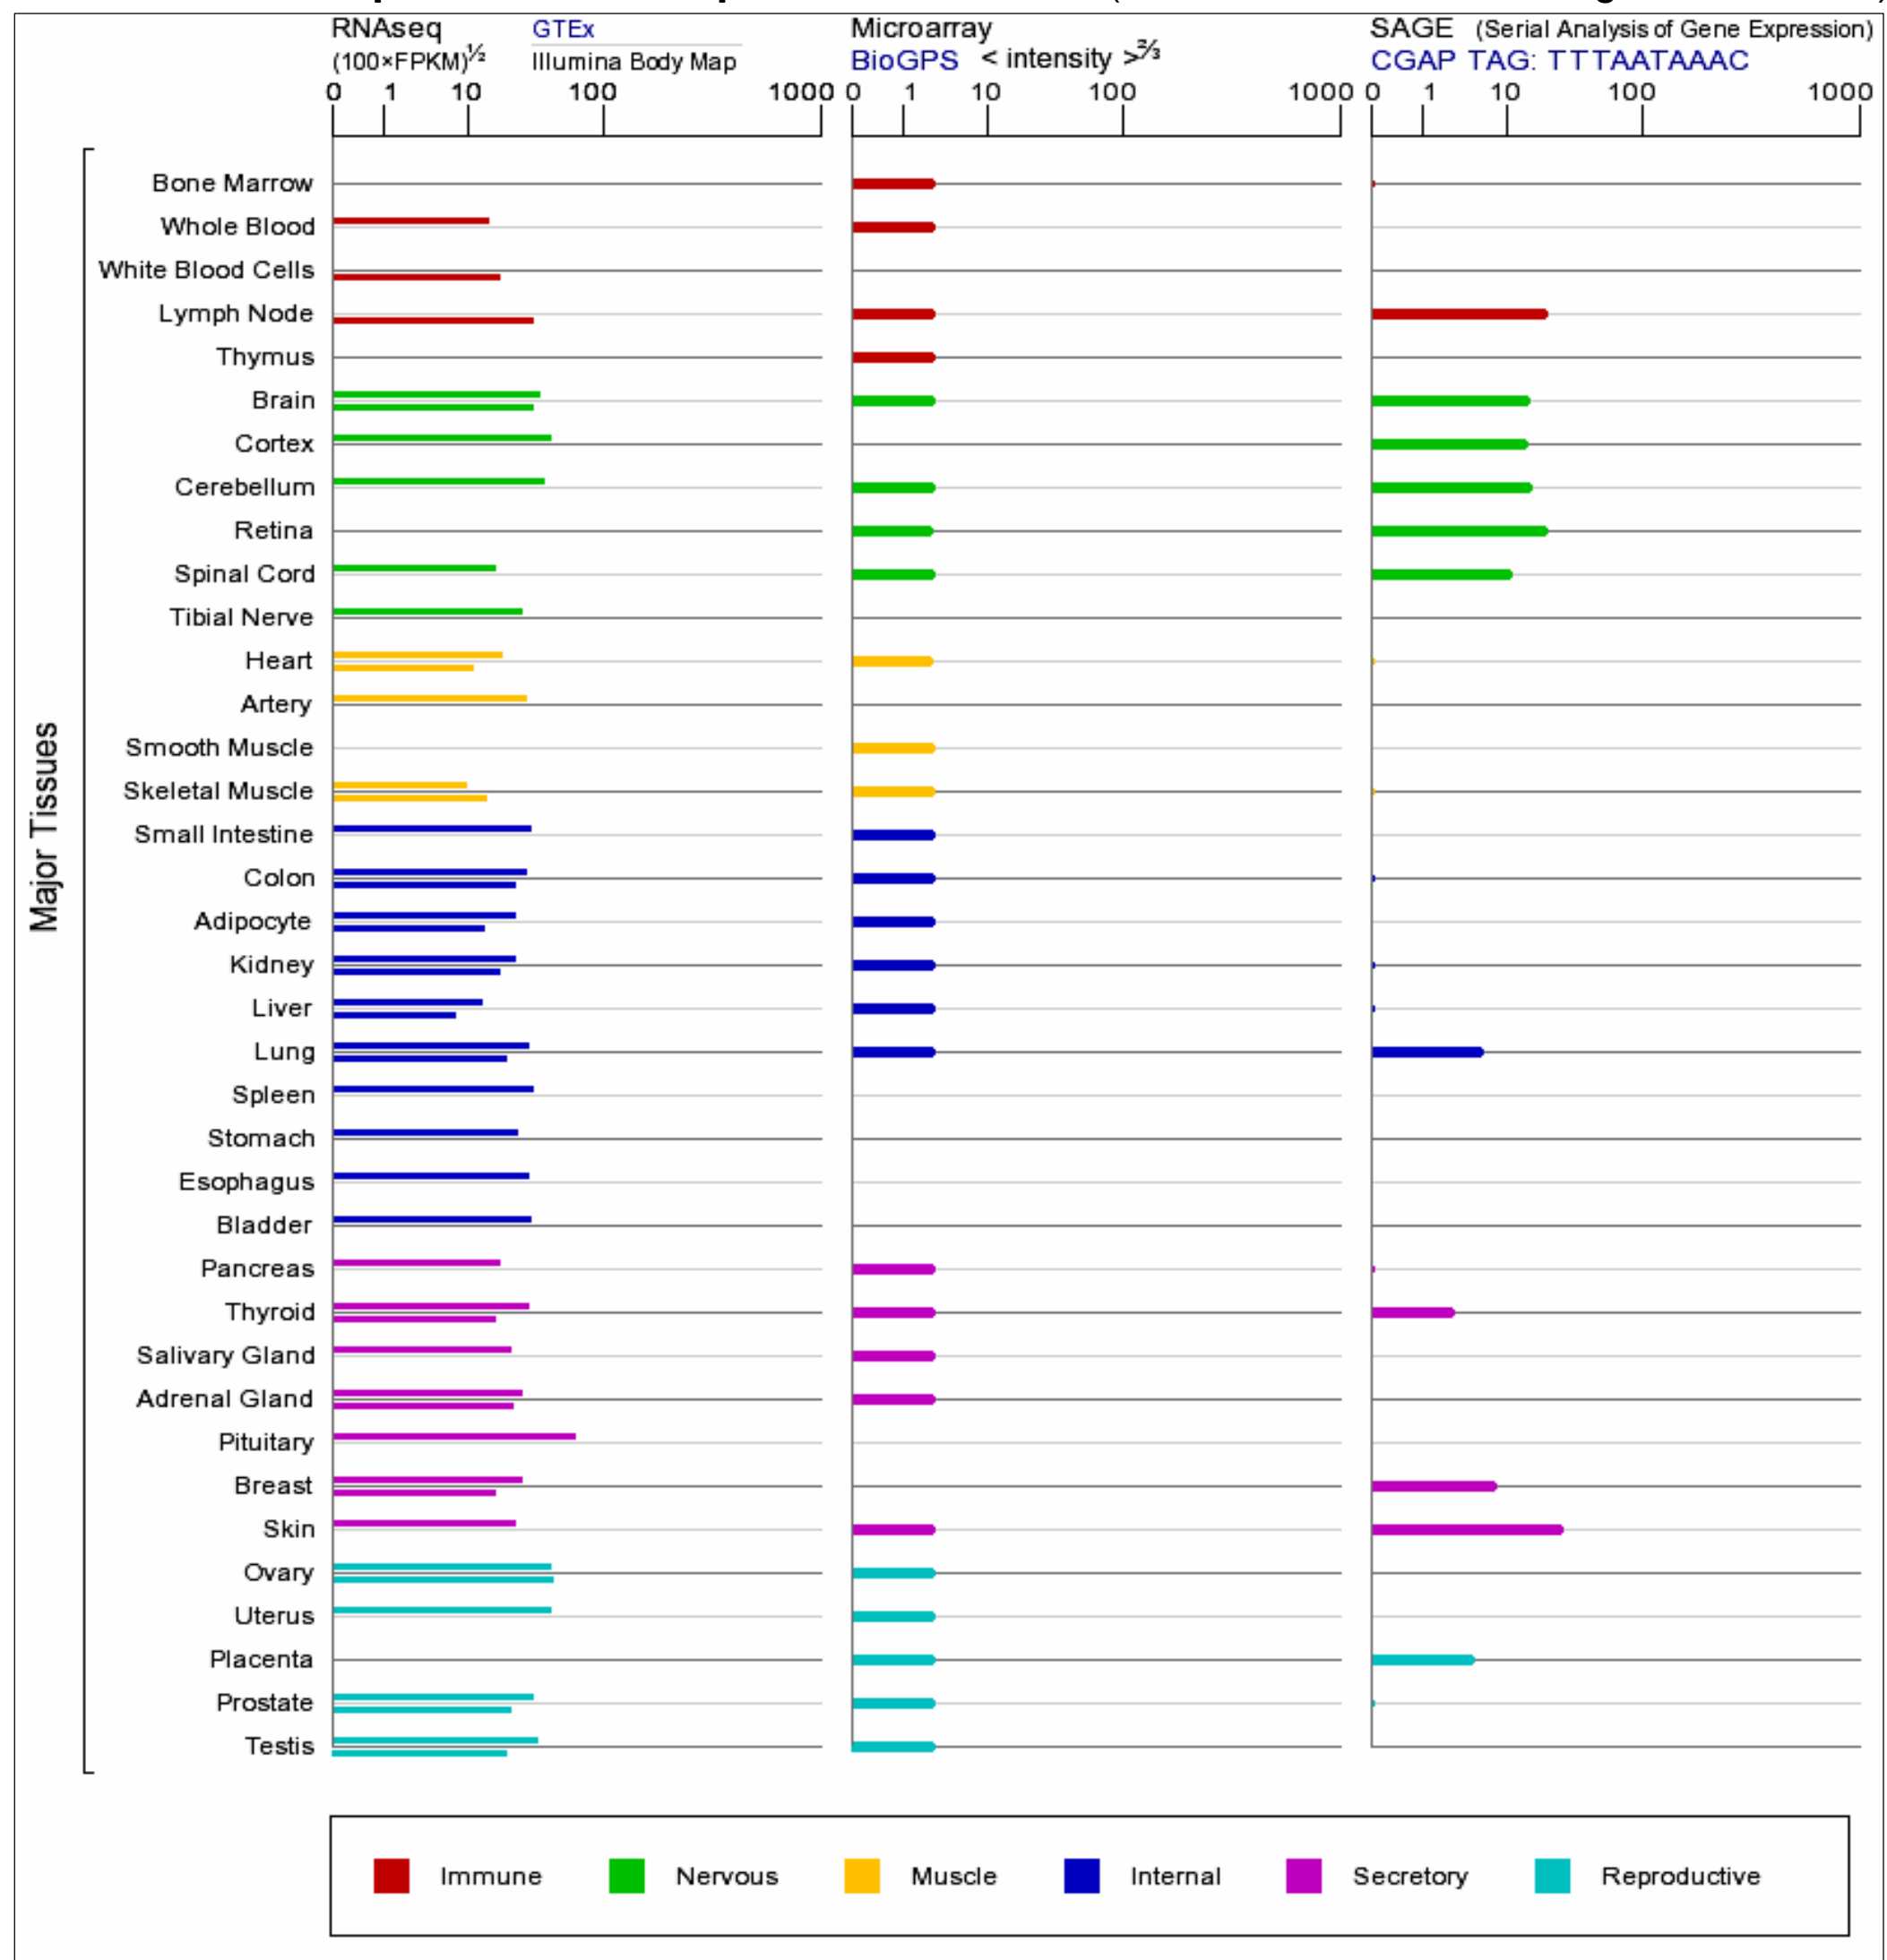

### B *RASA5* protein expression in multiple normal tissues (from Human Protein Atlas version 17)

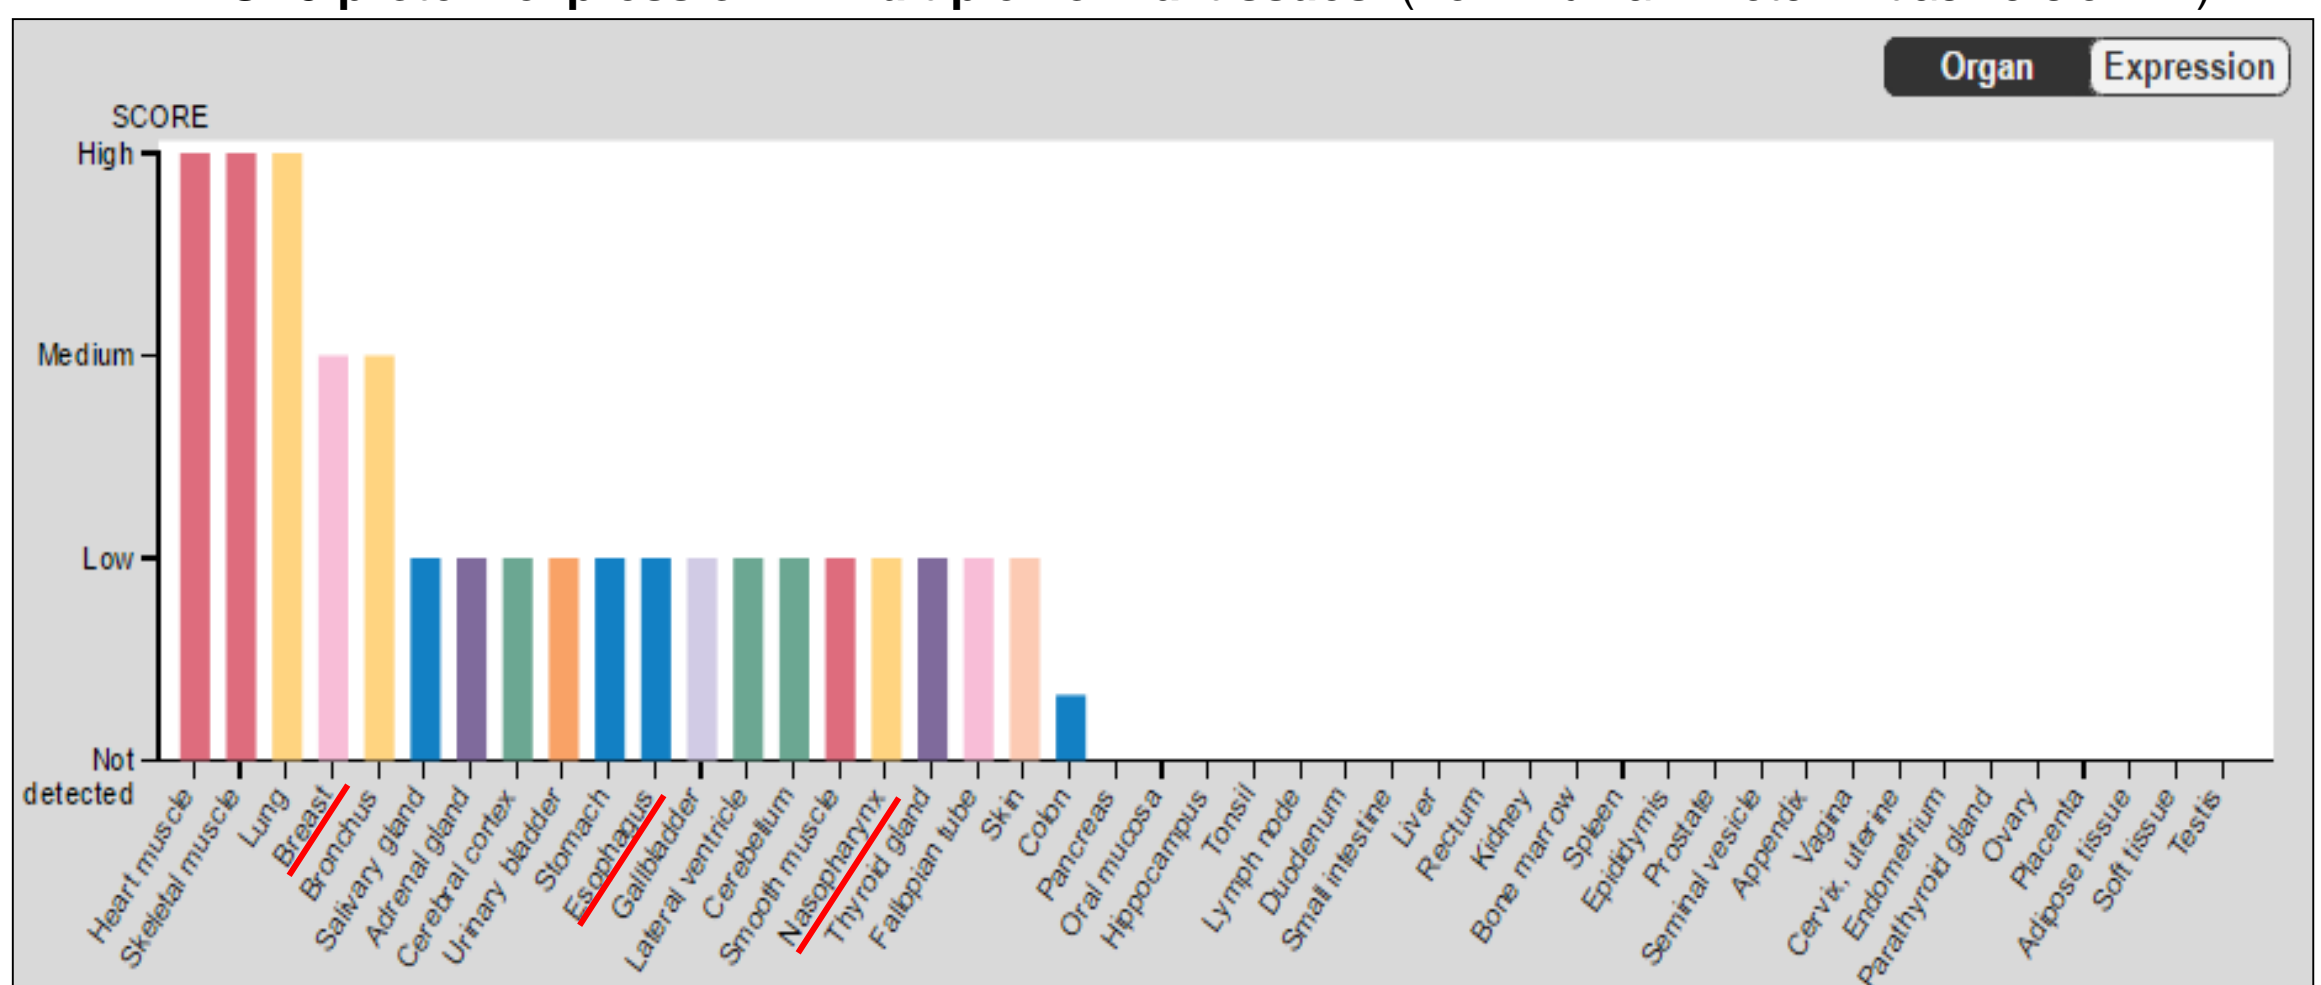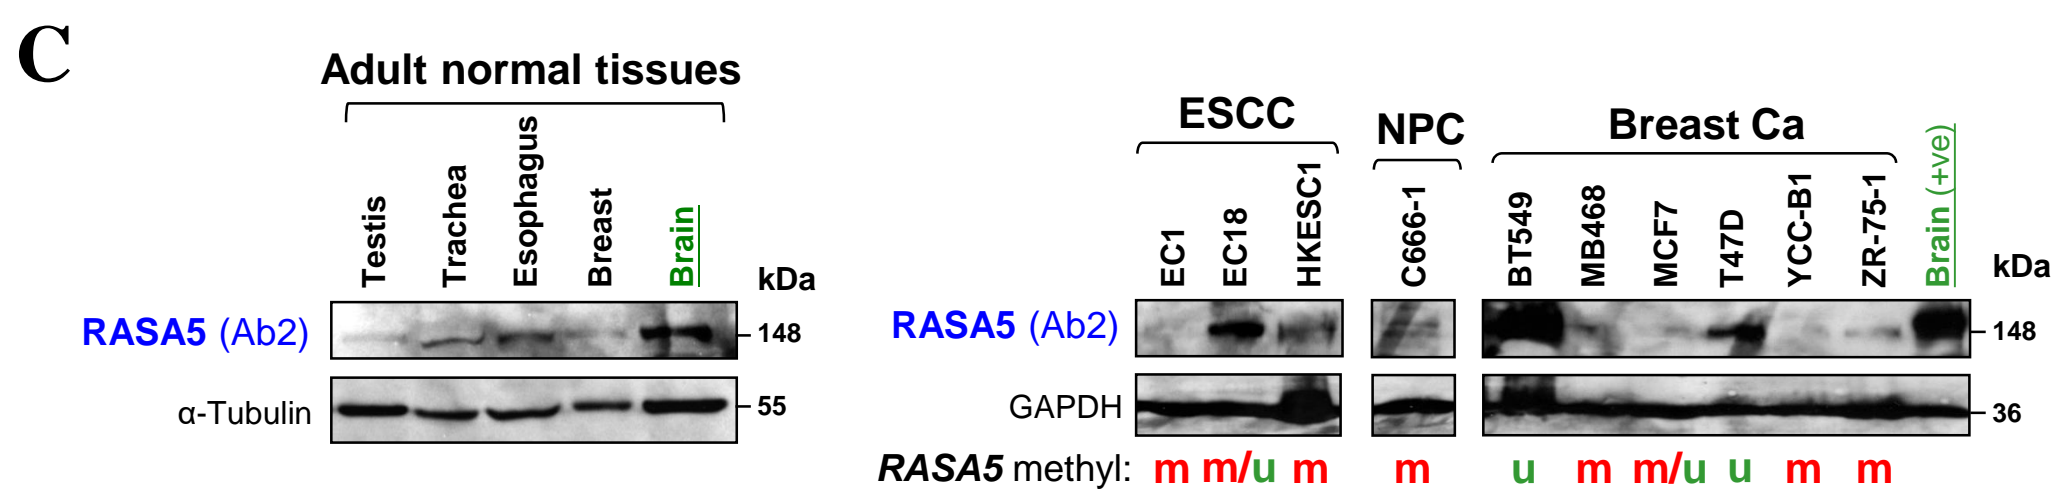

**A**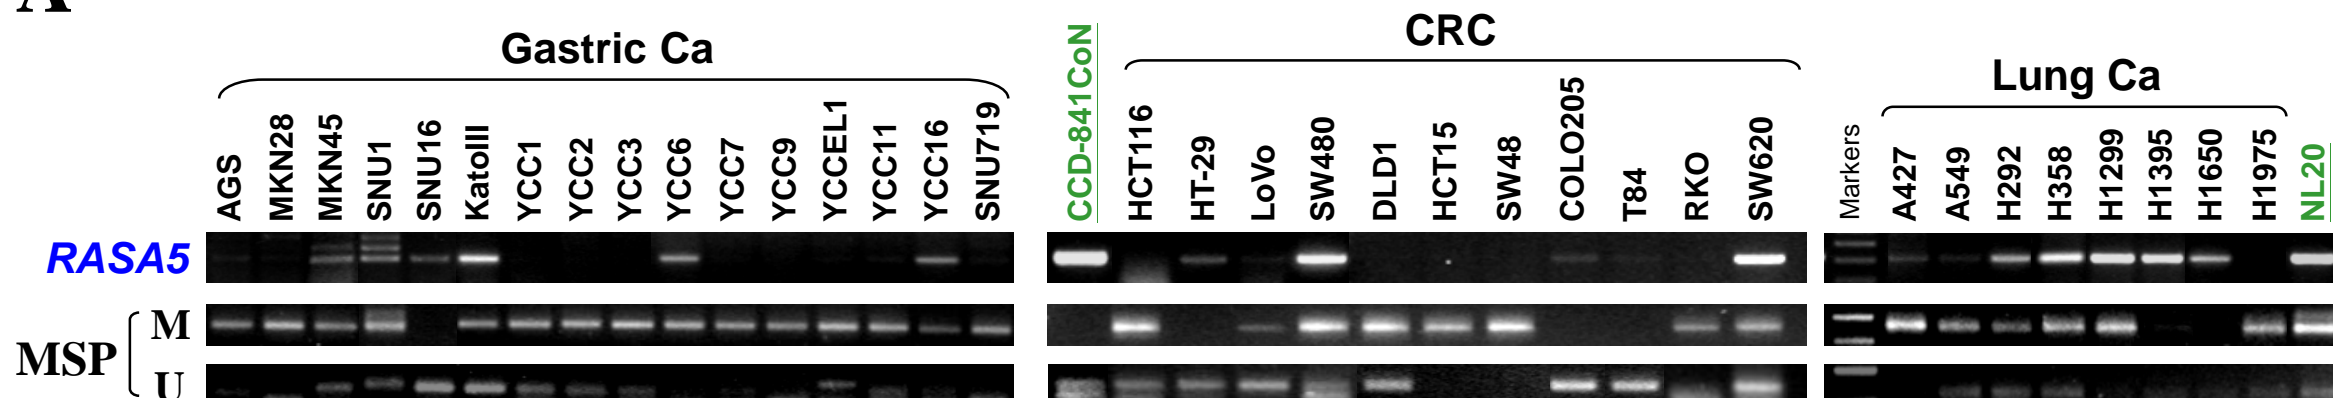**B**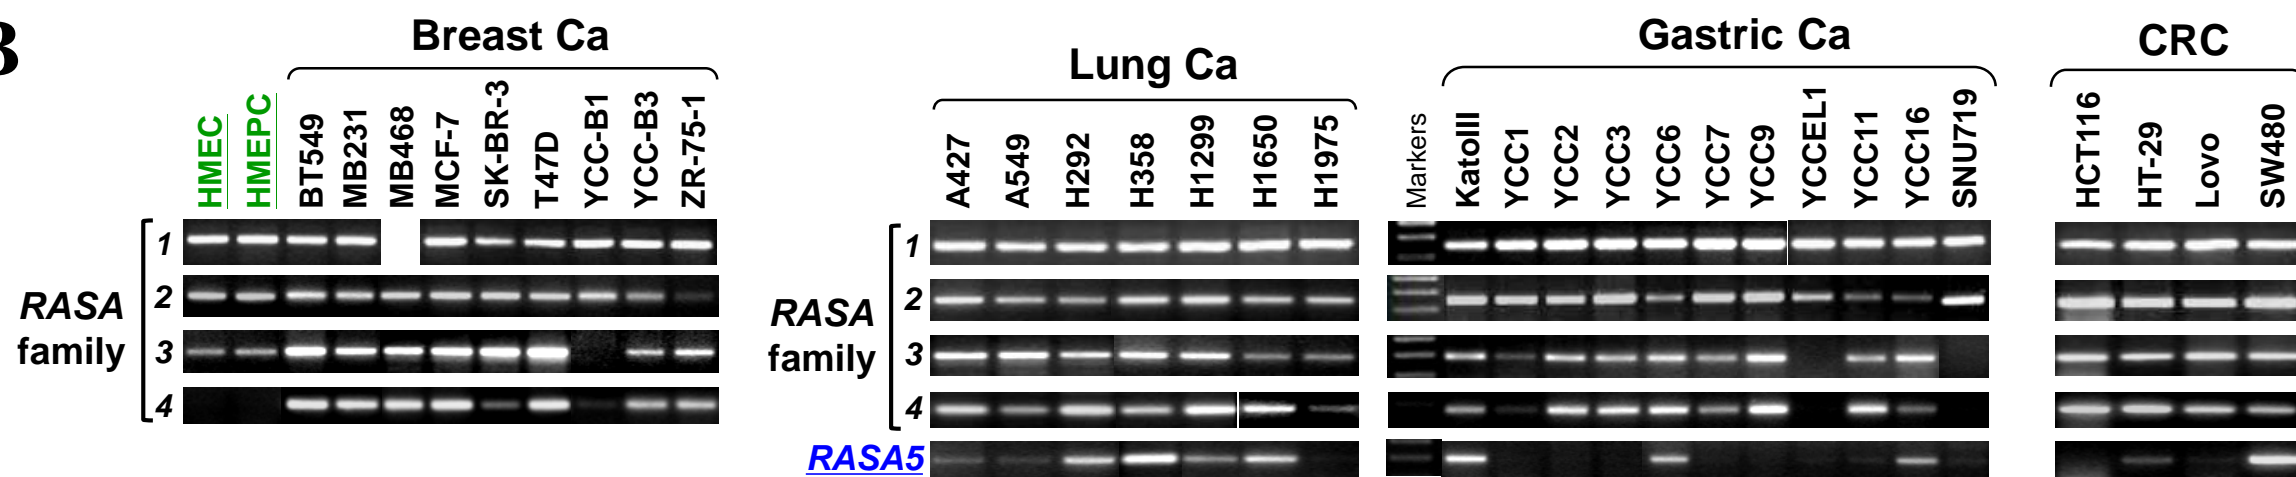**C**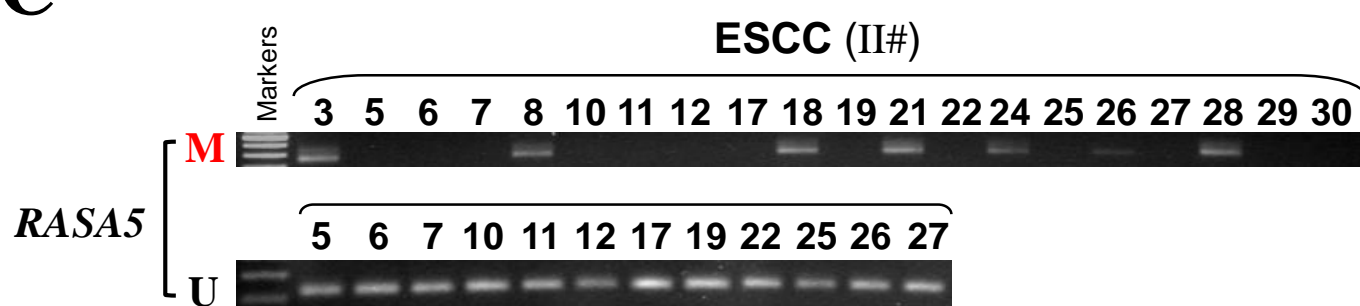**D**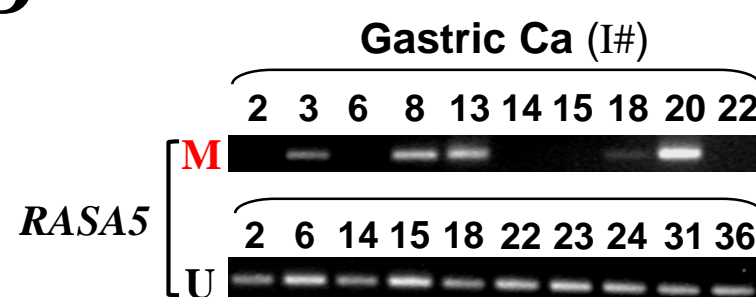**E**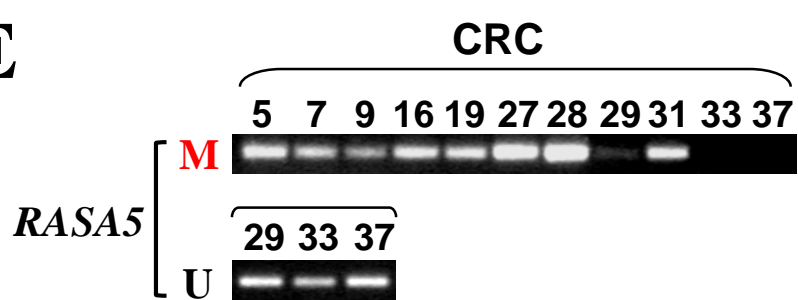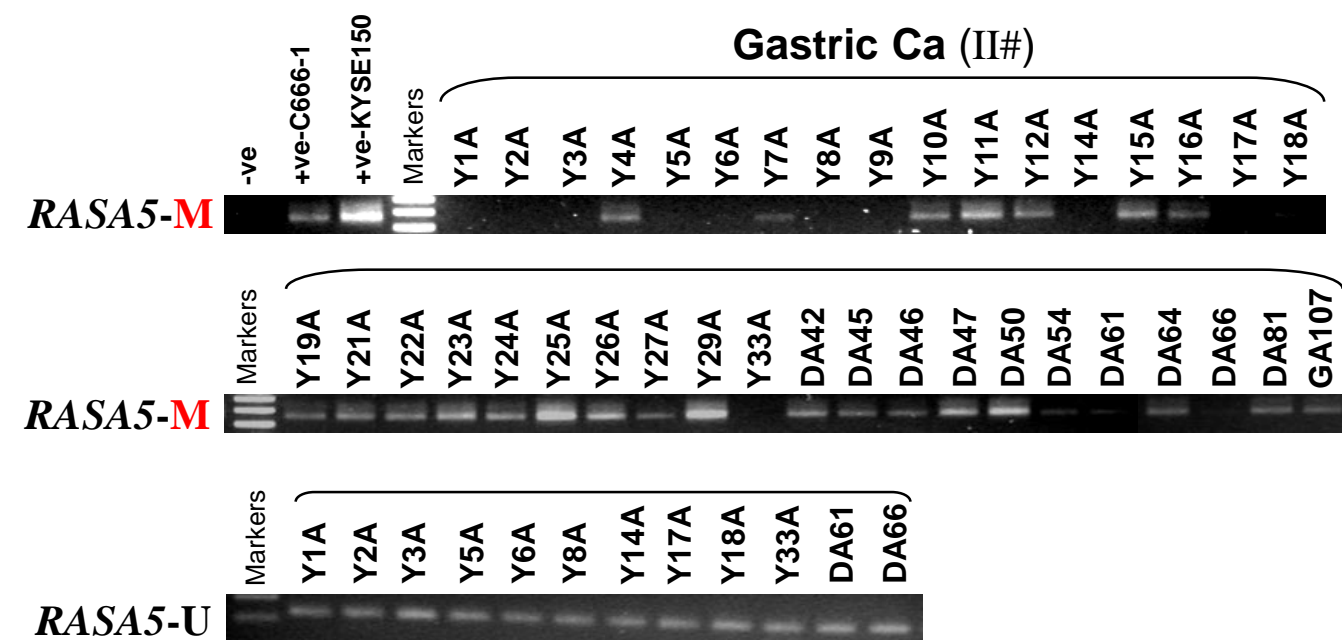**F**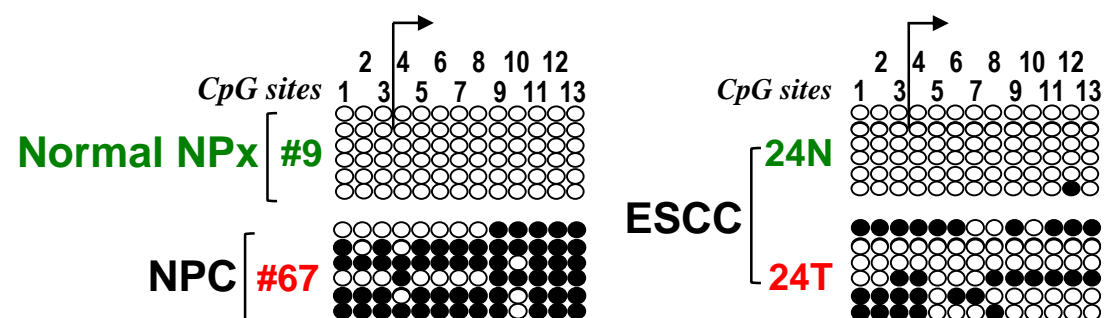



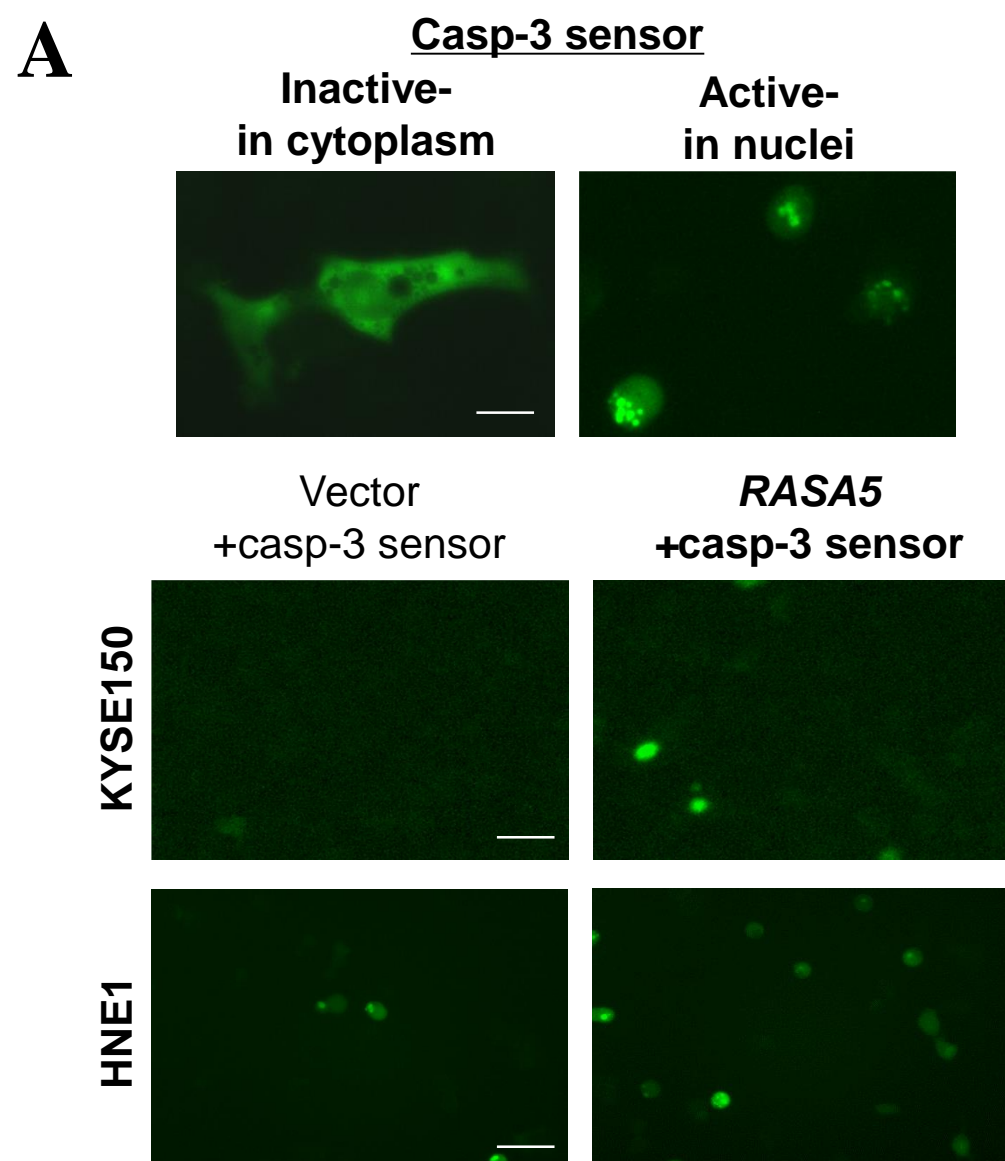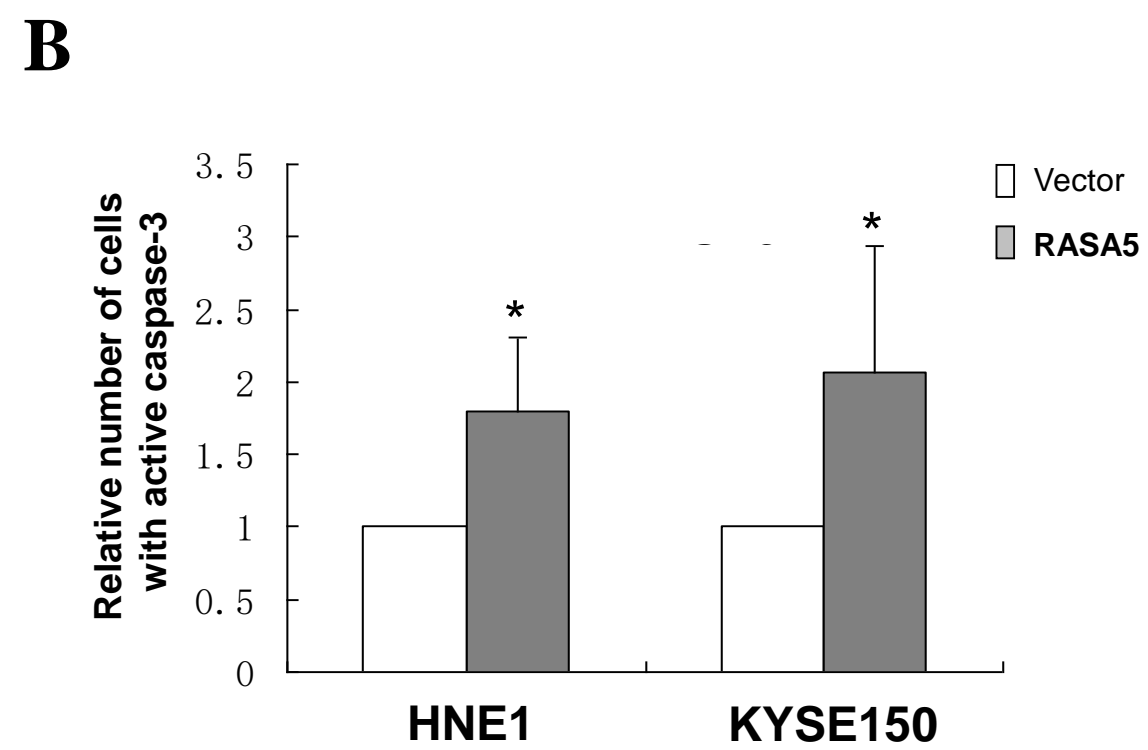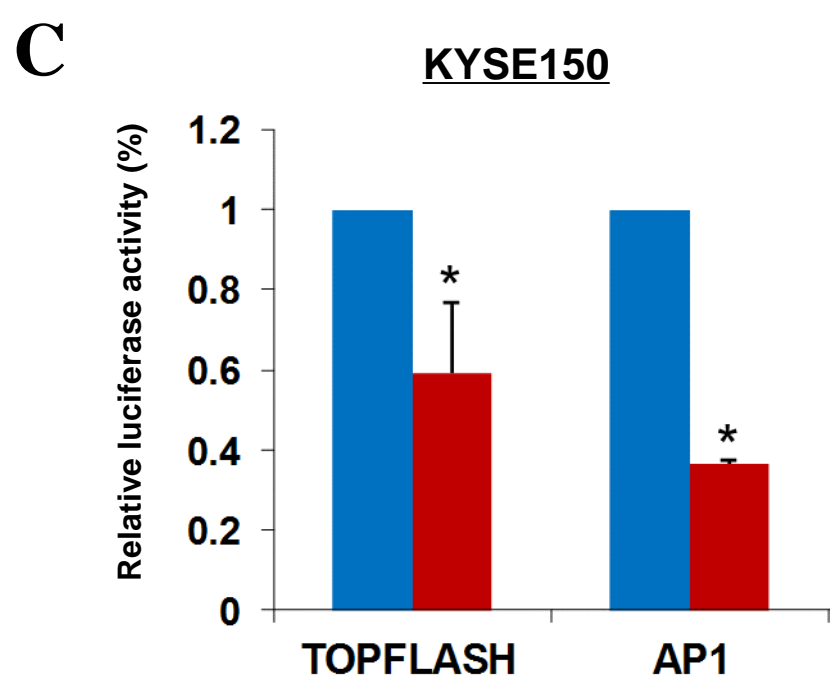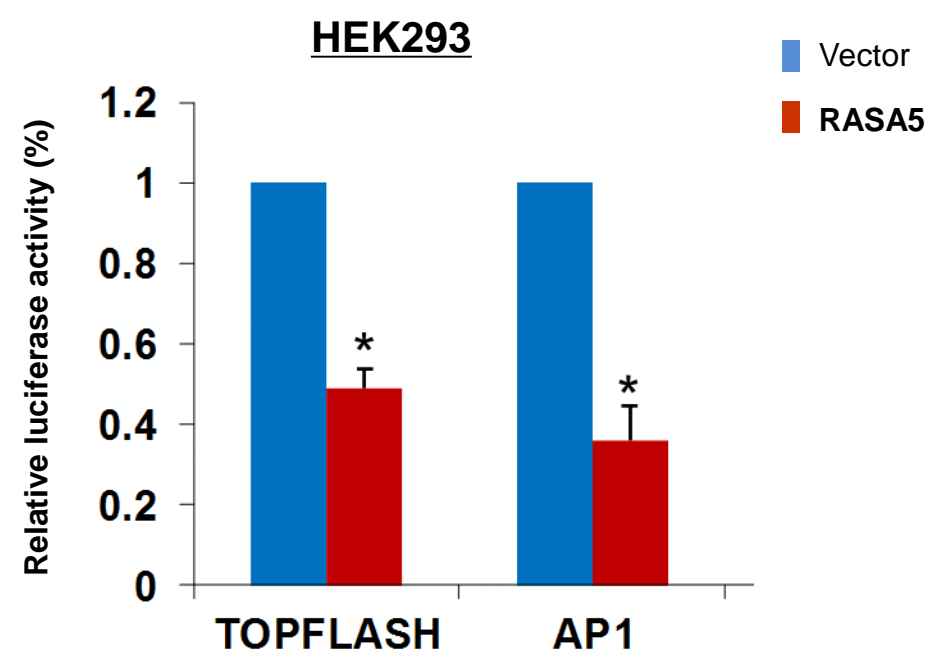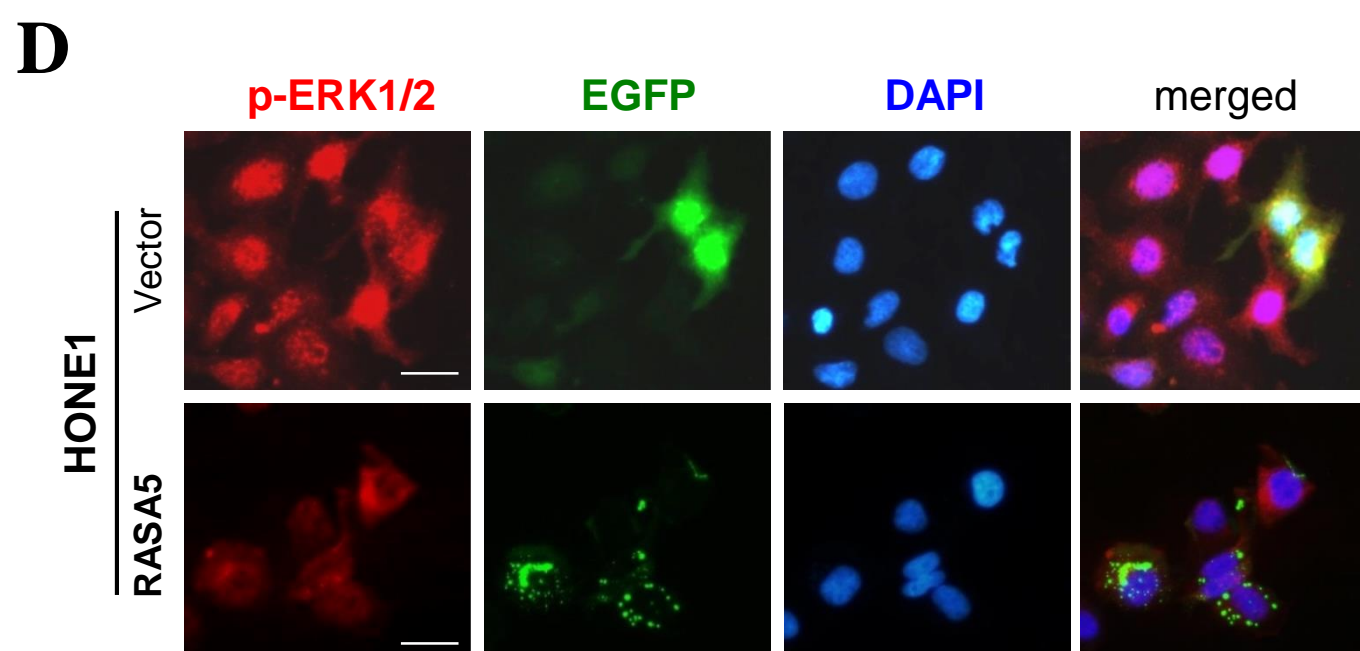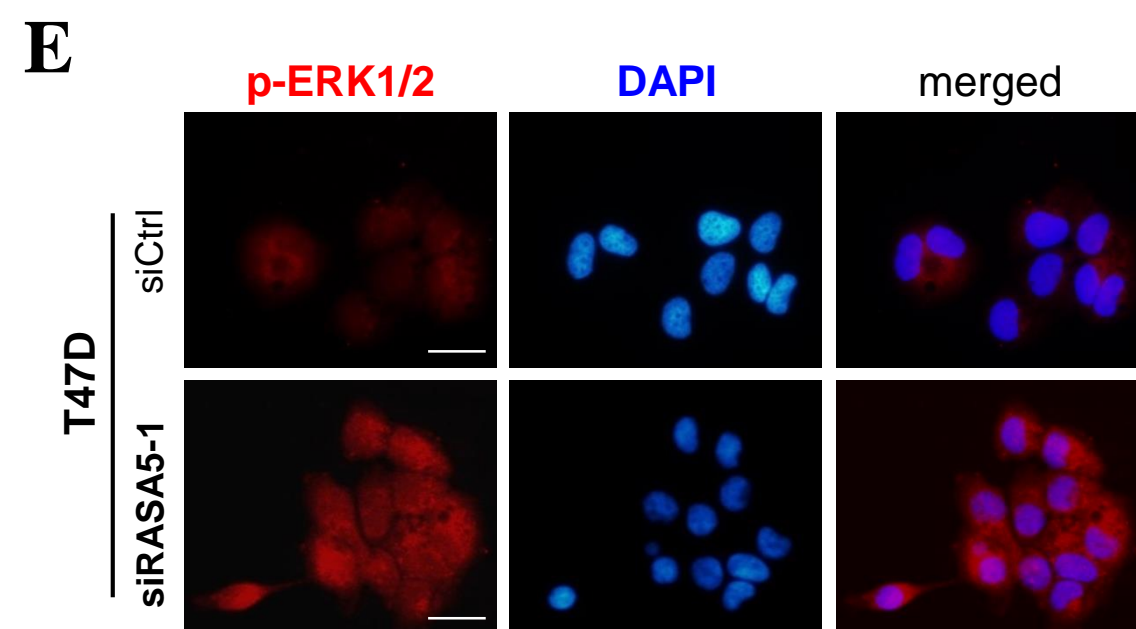

T47D

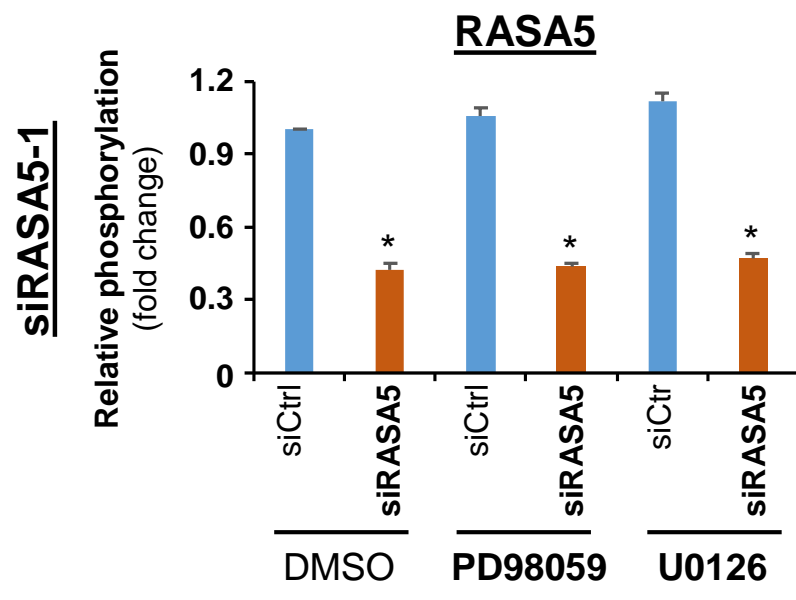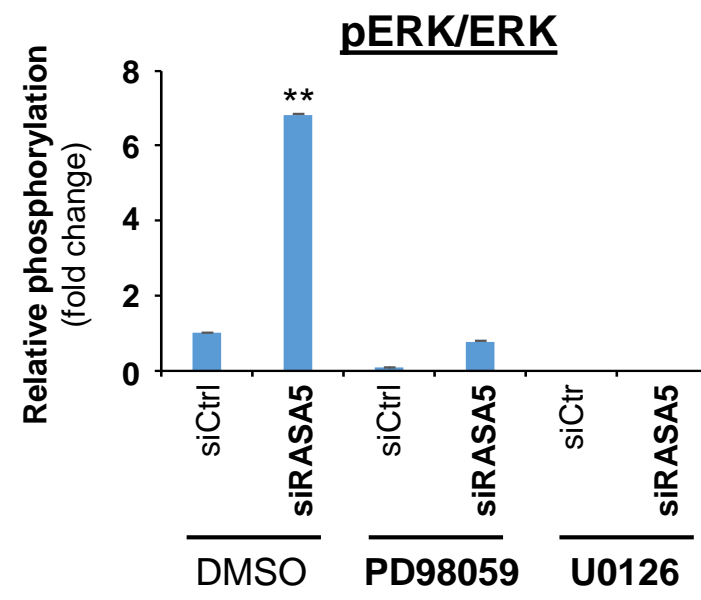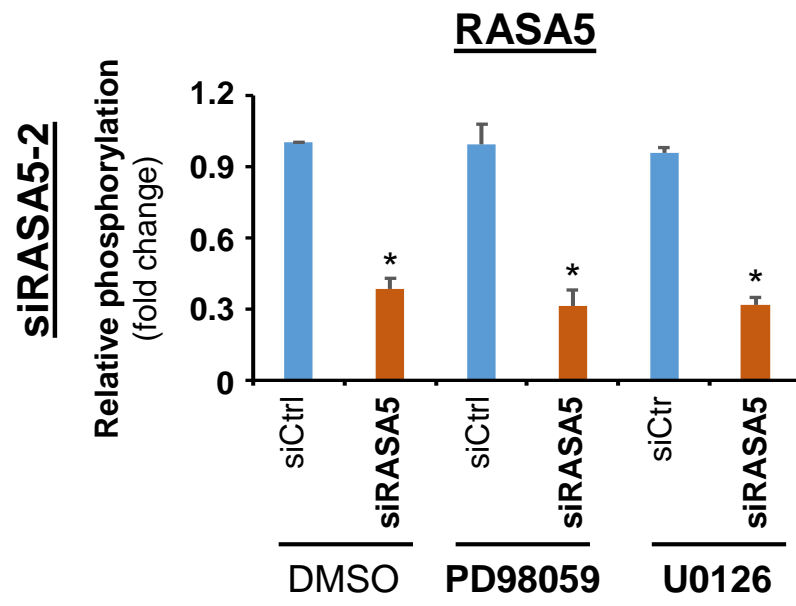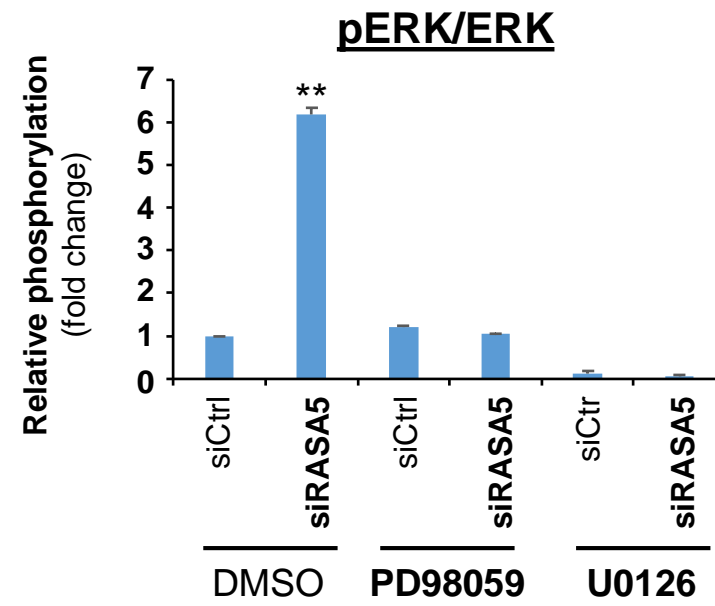

BT549

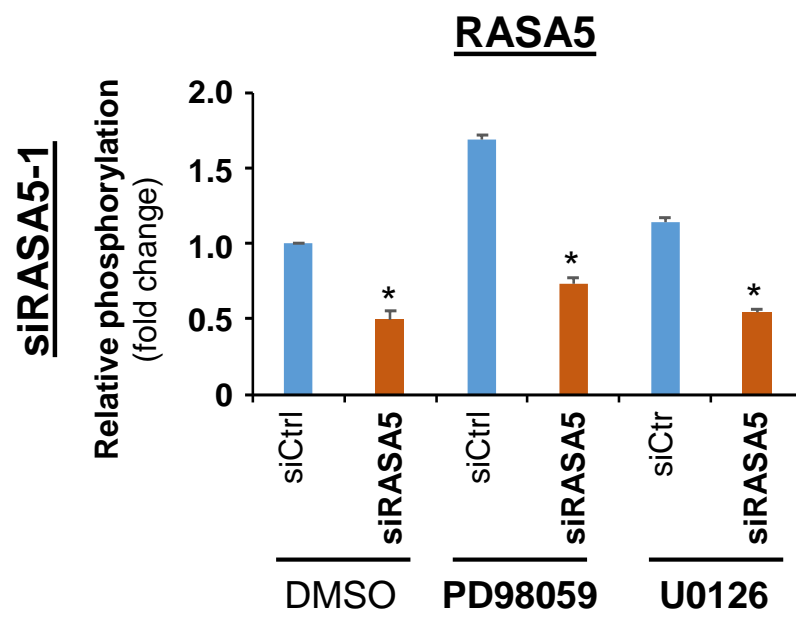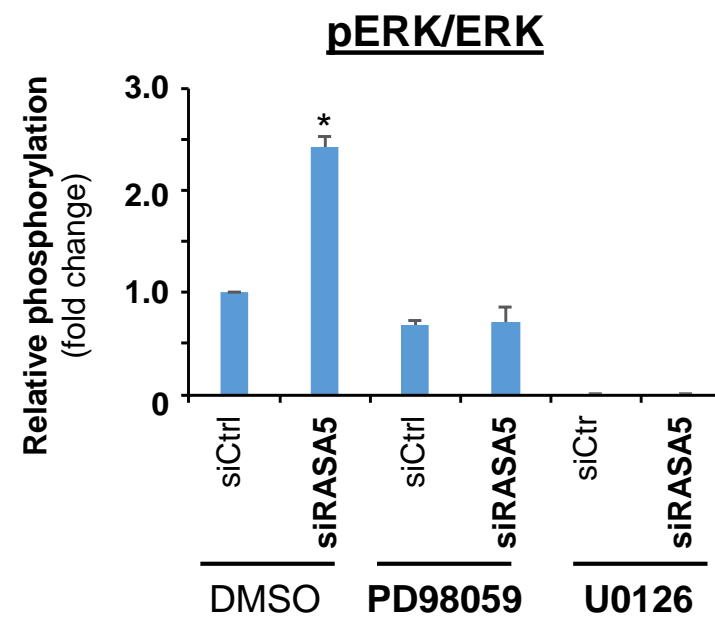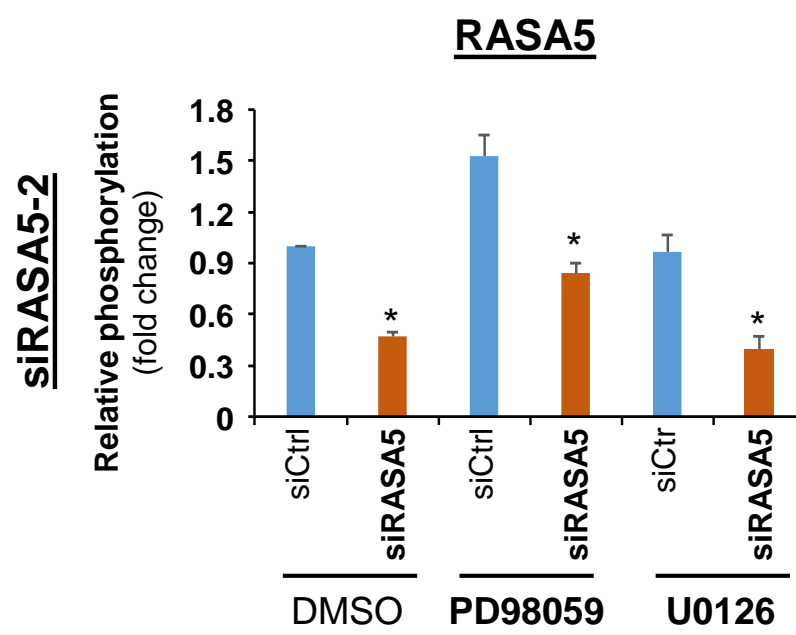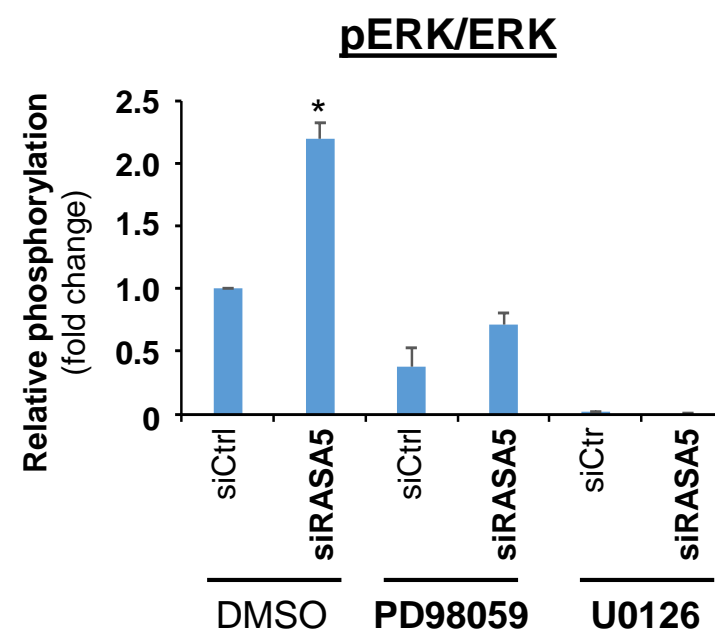





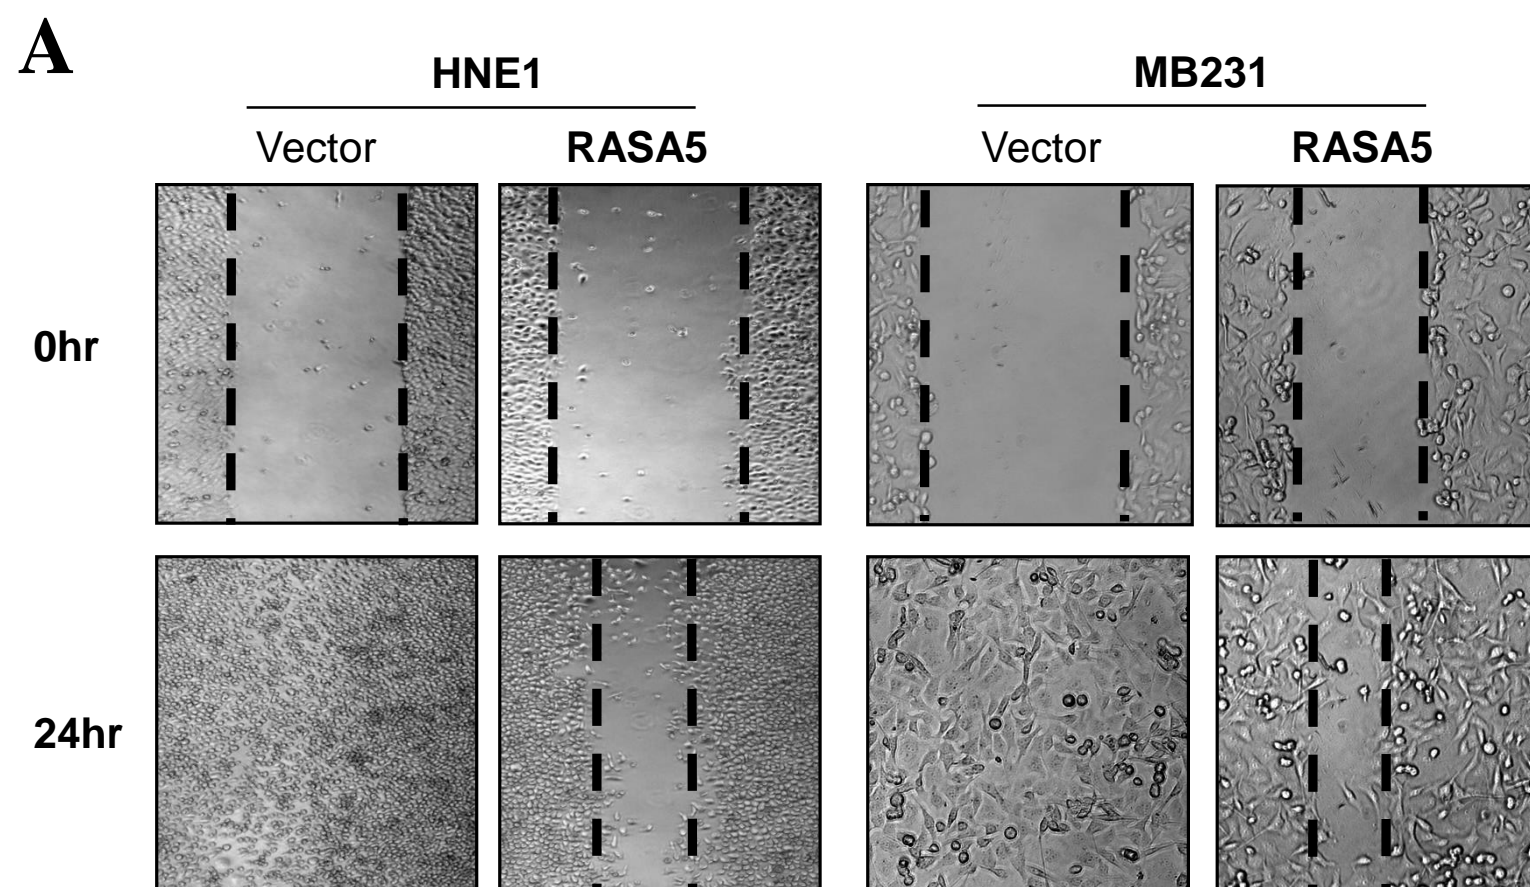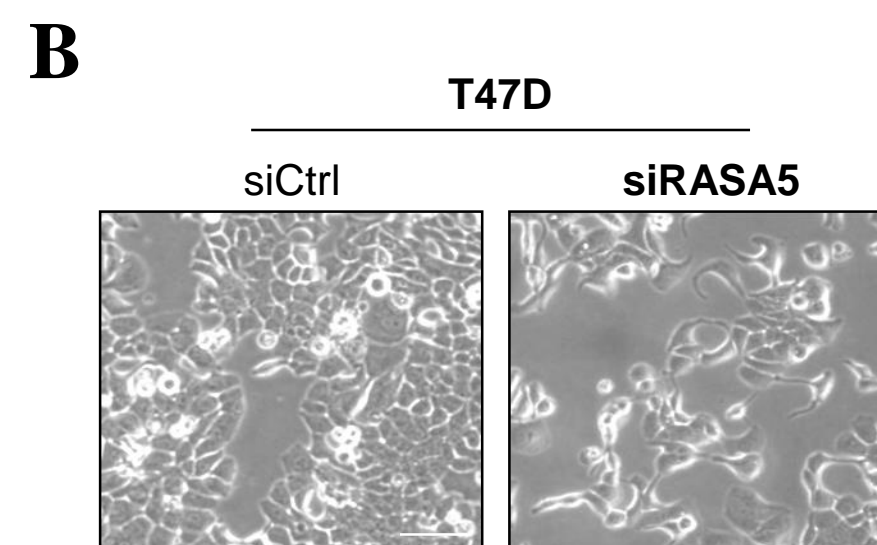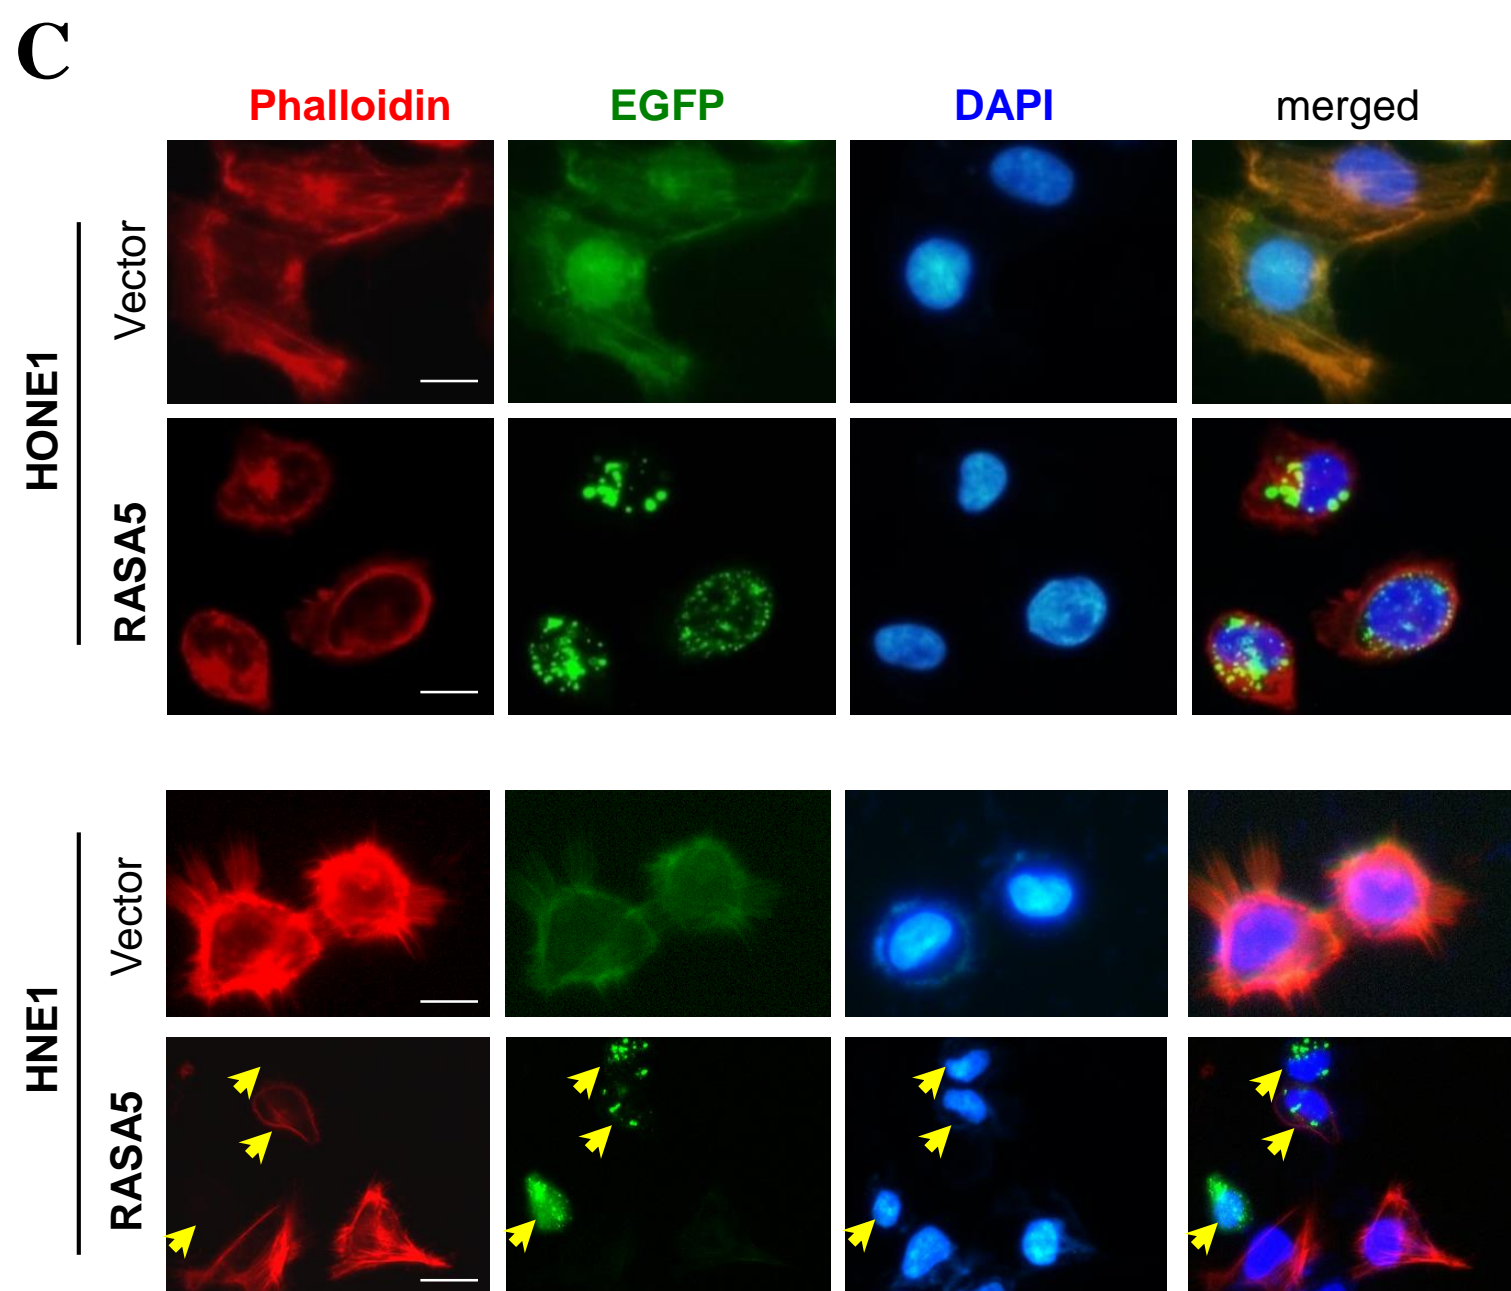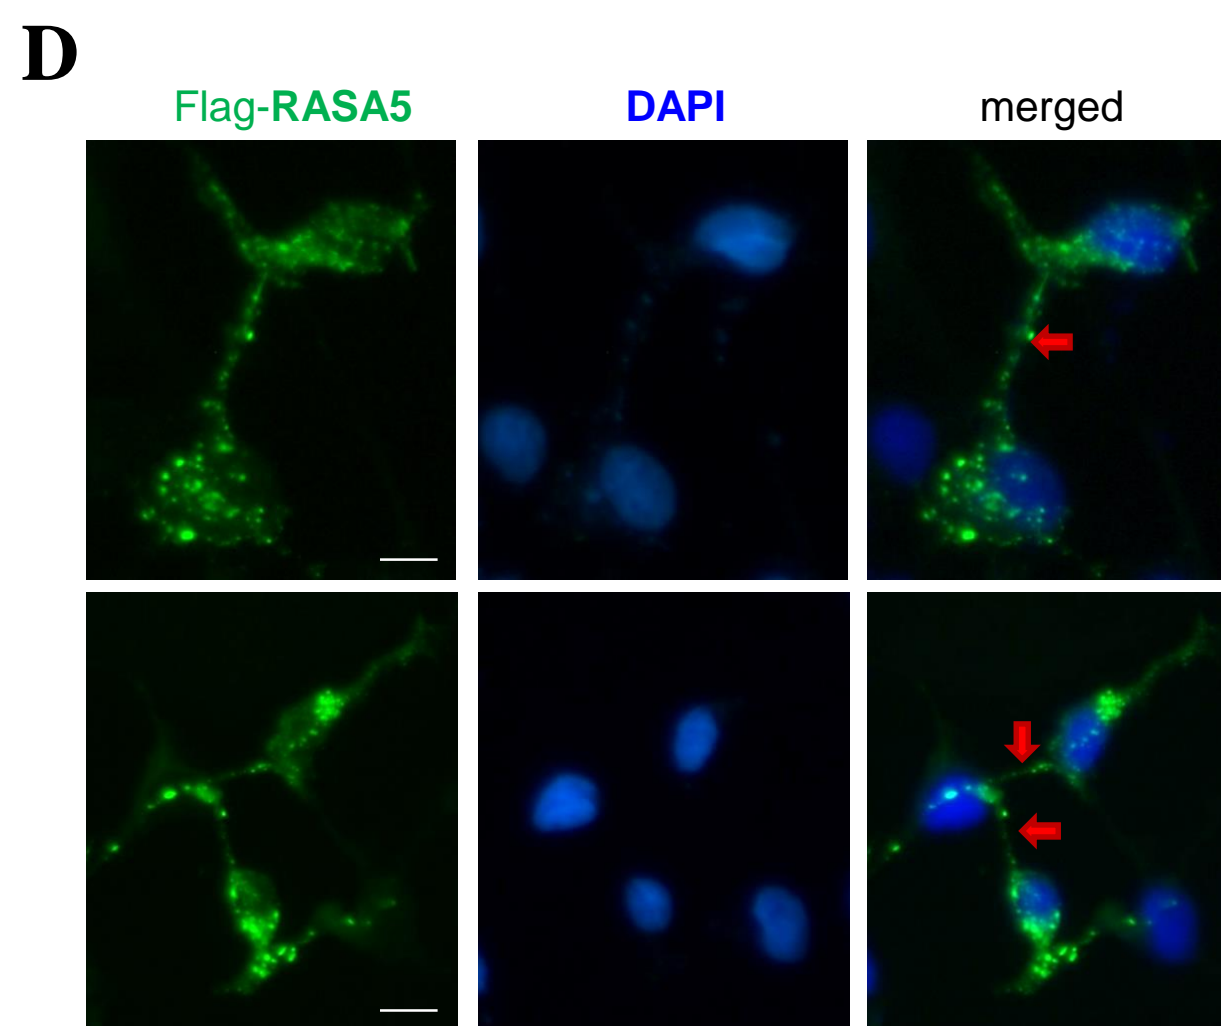



**Table S1.** Summary of other genes within 6p21.3 deletion and their predicted functions, related to Figure 1.

| <b>Gene</b>            | <b>Description</b>                                               | <b>Predicted function</b>                                                                                                                                                                                           |
|------------------------|------------------------------------------------------------------|---------------------------------------------------------------------------------------------------------------------------------------------------------------------------------------------------------------------|
| <b><i>BRD2</i></b>     | Bromodomain containing 2                                         | Involved in transcription complexes and acetylated chromatin during mitosis.                                                                                                                                        |
| <b><i>RPL32P1</i></b>  | Ribosomal protein L32 pseudogene 1                               | No CCDS                                                                                                                                                                                                             |
| <b><i>COL11A2P</i></b> | Collagen, type XI, alpha 2 pseudogene                            | No CCDS                                                                                                                                                                                                             |
| <b><i>COL11A2</i></b>  | Collagen, type XI, alpha 2                                       | Mutations in this gene are associated with type III Stickler syndrome.                                                                                                                                              |
| <b><i>RXRβ</i></b>     | Retinoid X receptor, beta                                        | Increasing both DNA binding and transcriptional function.                                                                                                                                                           |
| <b><i>SLC39A7</i></b>  | Solute carrier family 39 (zinc transporter), member 7            | Zinc cannot passively diffuse across cell membranes and requires specific transporters, such as SLC39A7.                                                                                                            |
| <b><i>HSD17B8</i></b>  | Hydroxysteroid (17-beta) dehydrogenase 8                         | Regulating the concentration of biologically active estrogens and androgens.                                                                                                                                        |
| <b><i>RING1</i></b>    | Ring finger protein 1                                            | Acting as a transcriptional repressor interacts with the polycomb group proteins.                                                                                                                                   |
| <b><i>ZNF314P</i></b>  | Zinc finger protein 314 pseudogene                               | No CCDS                                                                                                                                                                                                             |
| <b><i>HTATSF1P</i></b> | HIV-1 Tat specific factor 1 pseudogene                           | No CCDS                                                                                                                                                                                                             |
| <b><i>VPS52</i></b>    | Vacuolar protein sorting 52 homolog ( <i>S. cerevisiae</i> )     | Involved in tetrameric Golgi-associated retrograde protein complex.                                                                                                                                                 |
| <b><i>RPS18</i></b>    | Ribosomal protein S18                                            | S13P family of ribosomal proteins.                                                                                                                                                                                  |
| <b><i>WDR46</i></b>    | WD repeat domain 46                                              | Possessing WD40 domain, found in a number of eukaryotic proteins that cover a wide variety of functions including adaptor/regulatory modules in signal transduction, pre-mRNA processing and cytoskeleton assembly. |
| <b><i>PFDN6</i></b>    | Prefoldin subunit 6                                              | A subunit of the heteromeric prefoldin complex that chaperones nascent actin and alpha- and beta-tubulin chains pending their transfer to the cytosolic chaperonin containing TCP1 complex.                         |
| <b><i>RGL2</i></b>     | Ral guanine nucleotide dissociation stimulator-like 2            | Possessing Ras guanyl-nucleotide exchange factor activity.                                                                                                                                                          |
| <b><i>ZBTB22</i></b>   | Zinc finger and BTB domain containing 22                         | Interacting with BDP1, a subunit of TFIIB.                                                                                                                                                                          |
| <b><i>B3GALT4</i></b>  | UDP-Gal:betaGlcNAc beta 1,3-galactosyltransferase, polypeptide 4 | Encoding type II membrane-bound glycoproteins with diverse enzymatic functions using different donor substrates.                                                                                                    |
| <b><i>DAXX</i></b>     | Death-domain associated protein                                  | Interacting with apoptosis antigen Fas, centromere protein C, and transcription factor erythroblastosis virus E26 oncogene homolog 1.                                                                               |
| <b><i>TAPBP</i></b>    | TAP binding protein (tapasin)                                    | Transporting antigenic peptides across the endoplasmic reticulum membrane.                                                                                                                                          |
| <b><i>PHF1</i></b>     | PHD finger protein 1                                             | Zinc finger-like PHD (plant homeodomain) finger.                                                                                                                                                                    |
| <b><i>RPL12P1</i></b>  | Ribosomal protein L12 pseudogene 1                               | No CCDS                                                                                                                                                                                                             |
| <b><i>RPL35AP4</i></b> | Ribosomal protein L35a pseudogene 4                              | No CCDS                                                                                                                                                                                                             |
| <b><i>KIFC1</i></b>    | Kinesin family member C1                                         | Important in a cargo-transport system.                                                                                                                                                                              |
| <b><i>CUTA</i></b>     | CutA divalent cation tolerance homolog ( <i>E. coli</i> )        | Undergoing an unusual transfer into the secretory pathway and affecting the folding, oligomerization, and secretion of acetylcholinesterase.                                                                        |
| <b><i>ZBTB9</i></b>    | Zinc finger and BTB domain containing 9                          |                                                                                                                                                                                                                     |
| <b><i>GGNBP1</i></b>   | Gametogenetin binding protein 1                                  | No CCDS                                                                                                                                                                                                             |
| <b><i>BAK1</i></b>     | BCL2-antagonist/killer 1                                         | Localized to mitochondria, inducing apoptosis; interacting with the tumor suppressor P53 after exposure to cell stress.                                                                                             |
| <b><i>ITPR3</i></b>    | Inositol 1,4,5-triphosphate receptor, type 3                     | Encoding a receptor for inositol 1,4,5-trisphosphate, a second messenger that mediates the release of intracellular calcium.                                                                                        |
| <b><i>IP6K3</i></b>    | Inositol hexaphosphate kinase 3                                  | Encoding a protein that belongs to the inositol phosphokinase family.                                                                                                                                               |
| <b><i>LEMD2</i></b>    | LEM domain containing 2                                          | Regulating kinase signaling in myoblast differentiation.                                                                                                                                                            |
| <b><i>MLN</i></b>      | Motilin                                                          | Regulating gastrointestinal contractions and motility; producing the mature peptide and a byproduct referred to as motilin-associated peptide.                                                                      |

**Table S2.** Summary of *RASA5* methylation in carcinomas and normal cell lines, related to Figure 2.

| <b>Samples</b>                                          | <b>Promoter methylation (%)</b> |
|---------------------------------------------------------|---------------------------------|
| <b><u>Carcinoma cell lines</u></b>                      |                                 |
| Esophageal                                              | 18/18                           |
| Nasopharyngeal                                          | 5/5                             |
| Hypopharyngeal                                          | 1/1                             |
| Breast                                                  | 6/9 (67%)                       |
| Lung                                                    | 6/8 (75%)                       |
| Gastric                                                 | 15/16 (94%)                     |
| Colon                                                   | 9/10 (90%)                      |
| <b><u>Immortalized normal epithelial cell lines</u></b> |                                 |
| Het1A, NE1, NE3, NE083, NP460                           | 1/9 (11%)                       |
| HMEC, HMEpC, NL20, CCD841con                            |                                 |
| <b><u>Primary carcinomas</u></b>                        |                                 |
| ESCC paired primary tumor (T)                           | 12/20 (60%)                     |
| ESCC (I#)                                               | 12/49 (25%)                     |
| NPC (OCT#)                                              | 18/22 (82%)                     |
| Breast                                                  | 13/19 (68%)                     |
| Colon (I#)                                              | 8/11 (73%)                      |
| Gastric Ca (I#)                                         | 6/14 (43%)                      |
| Gastric Ca (II#)                                        | 26/38 (68%)                     |
| <b><u>Normal tissues</u></b>                            |                                 |
| Normal esophageal epithelial tissues                    | 0/7                             |
| ESCC paired normal tissues (N)                          | 2w/20 (10%)                     |
| Normal nasopharyngeal tissues                           | 0/8                             |
| Normal breast tissues                                   | 0/7                             |
| Breast adjacent tissues                                 | 0/5                             |

W: weak methylation.

**Table S3.** Sequences of other primers used in this study, related to Figure 2, 5 and 9.

| PCR                | Primers             | Sequence (5'-3')                                                                   | Cycles |
|--------------------|---------------------|------------------------------------------------------------------------------------|--------|
| RT-PCR             | NANOGF              | ATGAGTGTGGATCCAGCTTG                                                               | 30     |
|                    | NANOGR              | CCTGAATAAGCAGATCCATGG                                                              |        |
|                    | NESTIN <sub>F</sub> | TGGCACACATGGAGACGTC                                                                | 30     |
|                    | NESTIN <sub>R</sub> | AGCGATCTGGCTCTGTAGG                                                                |        |
|                    | ABCG2 <sub>F</sub>  | CAGTGTCACAAGGAAACACC                                                               | 30     |
|                    | ABCG2 <sub>R</sub>  | GAGACCAGGTTTCATGATCC                                                               |        |
|                    | OCT4 <sub>F</sub>   | AAGGAGAAGCTGGAGCAA                                                                 | 30     |
|                    | OCT4 <sub>R</sub>   | GAGGGTTTCTGCTTTGCAT                                                                |        |
|                    | MCL1 <sub>F</sub>   | AGTTGTACCGGCAGTCGCTG                                                               | 30     |
|                    | MCL1 <sub>R</sub>   | CTAGGTCCTCTACATGGAAG                                                               |        |
|                    | c-MYCF              | CTCTCCGTCCTCGGATTCTC                                                               | 30     |
|                    | c-MYCR              | GCCTCCAGCAGAAGGTGATC                                                               |        |
|                    | KLF4 <sub>F</sub>   | TCCCATCTTTCTCCACGTTT                                                               | 30     |
|                    | KLF4 <sub>R</sub>   | TCCAGGAGATCGTTGAACTC                                                               |        |
|                    | CD44 <sub>F</sub>   | TGGACAAGTTTTTGGTGGCAC                                                              | 30     |
|                    | CD44 <sub>R</sub>   | GGTGCTATTGAAAGCCTTGC                                                               |        |
|                    | GAPDH <sub>F</sub>  | GATGACCTTGCCACAGCCT                                                                | 23     |
| GAPDH <sub>R</sub> | ATCTCTGCCCTCTGCTGA  |                                                                                    |        |
| MSP                | RASA5m4             | CGTTTTTTTTTTTTTTTCGGTTGTC                                                          | 40     |
|                    | RASA5m2             | CTAAAAAAAAACATAAAACATCGCG                                                          |        |
|                    | RASA5u11            | GCGGTTTTTTTTTTTTTTTTTTTTTTTGT                                                      | 40     |
|                    | RASA5u22            | GCGCTAAAAAAAAACATAAAACATCACA                                                       |        |
| BGS                | RASA5BGS5           | GTAGGGGTGGGGGTTGTAG                                                                | 40     |
|                    | RASA5BGS6           | CCTCTAAAAAAAAACATAAAACATC                                                          |        |
| Cloning            | RASA5CF             | GCTGGATCCGACACCATGGATTACAAGGATGACGACGATAAGAGCAGGTCTCGAGCCTCC                       | 15     |
|                    | RASA5CR             | GATGTCTAGACTAGTGGTCTGCGGTGTTTC                                                     |        |
|                    | RASA5ΔGAP-LF        | GCTGGATCCGACACCATGGATTACAAGGATGACGACGATAAGAGCAGGTCTCGAGCCTCC                       |        |
|                    | RASA5ΔGAP-LR        | GATGTCTAGACTACCCACTGCCTGTTGGCAG                                                    |        |
|                    | RASA5ΔGAP-GF        | TACCGGACTCAGATCTCGAGCGCCACCATGGATTACAAGGATGACGACGATAAGATGAGCA<br>GGTCTCGAGCCTCCATC |        |
|                    | RASA5ΔGAP-GR        | TACCGTCGACTGCAGAATTCCTAGTGGTCTGCGGTGTTTCGGAAC                                      |        |
|                    | RASA5ΔC2-GAPF       | GCTGGATCCGACACCATGGATTACAAGGATGACGACGATAAGAGCAGGTCTCGAGCCTCC                       |        |
|                    | RASA5ΔC2-GAPR       | GATGTCTAGACTAGCGGCTGTTGTCTTGTG                                                     |        |

**Table S4.** Primers for screening 6p21.3 genes by semi-quantitative RT-PCR, related to Figure 1.

| <b>Gene</b>           | <b>Forward (5'-3')</b> | <b>Reverse (5'-3')</b> |
|-----------------------|------------------------|------------------------|
| <b><i>RASA5</i></b>   | GTCCTATGC CCCCTTCAGAG  | GTCCTATGCCCCCTTCAGAG   |
| <b><i>BRD2</i></b>    | CTTGCGGTCAAGATGCTGCA   | TTGGGATTGGACACCTCCG    |
| <b><i>COL11A2</i></b> | ATGGAGCGGTGCAGCCGC     | GCCACATCAGCTGGACAGAT   |
| <b><i>RXRB</i></b>    | AGAAATGCATTGTGGGGTCG   | AAGGGATGGAGCTGTTGAAG   |
| <b><i>SLC39A7</i></b> | GATCTGCAAGAGGACTTCCA   | GCTGCTGAGATCAGCACTGT   |
| <b><i>HSD17B8</i></b> | TCTCAGCTCCAGAACCGACT   | ACTTGTTCCAGCAGGCACCT   |
| <b><i>RING1</i></b>   | ACTGAGTCTGTATGAGCTGC   | CAGTCAGAGCAGAATCTGTG   |
| <b><i>VPS52</i></b>   | CTCAGATATGGAGGAGGAAG   | CATCCACTTCATCCAGGATG   |
| <b><i>RPS18</i></b>   | GCGAGTACTCAACACCAACA   | TTGGTGAGGTCAATGTCTGC   |
| <b><i>WDR46</i></b>   | GACAAACTTCAGACCAAGAG   | CTTAGAGATCCGAGACTTCT   |
| <b><i>PFDN6</i></b>   | TACCTTCCAGAGAGTGAGAC   | GTGCTTCAAGTTTCTGCCTC   |
| <b><i>RGL2</i></b>    | GAGTCGTAAGGAGCAGCTTC   | GGATCAAGAGGTCGATATTG   |
| <b><i>ZBTB22</i></b>  | AGGTTGCTGCTCTGGCCG     | CTGCAGACGCTGCTGATTGA   |
| <b><i>B3GALT4</i></b> | AACCAGGAAGCTTGCAAGTGG  | CCAGCTCTGATACCAGTTCA   |
| <b><i>DAXX</i></b>    | AGAAGATGAAGCAGCTGCT    | GAGAGTGGGCACGTTGCTG    |
| <b><i>TAPBP</i></b>   | ATGAAGTCCCTGTCTCTGCT   | AACTGAGATAGAGCTCAGG    |
| <b><i>PHF1</i></b>    | TCAAGATGTGCTGGCCAGAT   | TCTCAGAGCGACAGACACAA   |
| <b><i>KIFC1</i></b>   | TTCTCTTCCACTGCATTCCC   | GGCCATCTTCCATCTGGTCA   |
| <b><i>CUTA</i></b>    | GTCTCTGCAGCCTTTGTTAC   | CTCACTGTCTTCTCGATCT    |
| <b><i>ZBTB9</i></b>   | AGACCTCTGTGGGCACTGT    | AGGCAGCAGCTAACACTGCT   |
| <b><i>BAK1</i></b>    | AGGAGTGCGGAGAGCCTG     | GAGGTAAGGTGACCATCTCT   |
| <b><i>ITPR3</i></b>   | GTCAATGGCTTCATCAGCAC   | TCCTTGTCCTGCTTAGTCTG   |
| <b><i>IP6K3</i></b>   | GCACATGAGCGTGATGAAGT   | GACTCTGTGGAGACCTTGAA   |
| <b><i>LEMD2</i></b>   | CTCTCTCGGCTTCTGCTCT    | TCTCACAGTCCACTGGCAAT   |
| <b><i>MLN</i></b>     | AAGATGGTATCCCGTAAGGC   | CTCCGCAGGGTCTACAGG     |

**Table S5.** Antibodies used in this study, related to Figure 1-3 and Figure 5-8.

| <b>Antibodies</b>                                            | <b>Source</b>  | <b>Identifier</b> |
|--------------------------------------------------------------|----------------|-------------------|
| anti-mouse IgG F(ab) <sub>2</sub> antibody                   | DAKO           | F0313             |
| anti-mouse IgG-Alexa Fluor 555-F(ab') <sub>2</sub> antibody  | Cell Signaling | 4409              |
| anti-rabbit IgG-Alexa Fluor 555-F(ab') <sub>2</sub> antibody | Cell Signaling | 4413              |
| anti-mouse IgG-Alexa Fluor 488-F(ab') <sub>2</sub> antibody  | ThermoFisher   | A-11059           |
| anti-rabbit IgG-Alexa Fluor 488-F(ab') <sub>2</sub> antibody | ThermoFisher   | A-11070           |
| anti-mouse IgG-HRP                                           | DAKO           | P0161             |
| anti-rabbit IgG-HRP                                          | DAKO           | P0448             |
| α-tubulin                                                    | Lab Vision     | MS-581            |
| AKT (pan)                                                    | Cell Signaling | 4691              |
| b-actin (AC-74)                                              | Sigma-Aldrich  | A2228             |
| cleaved caspase-3                                            | Cell Signaling | 9661              |
| cleaved PARP                                                 | Cell Signaling | 9541              |
| E-Cadherin                                                   | Cell Signaling | 4065              |
| ERK1/2 (p44/42 MAPK)                                         | Cell Signaling | 4695              |
| Fibronectin                                                  | Santa Cruz     | sc-9068           |
| Flag                                                         | Sigma-Aldrich  | F3165             |
| GAPDH                                                        | Millipore      | MAB374            |
| MEK1/2                                                       | Cell Signaling | 4694              |
| phosphor-AKT (Ser473)                                        | Cell Signaling | 4060              |
| phosphor-Cofilin (Ser3)                                      | Cell Signaling | 3313              |
| phosphor-ERK1/2 (Thr202/Tyr204)                              | Cell Signaling | 9101              |
| phosphor-MEK1/2 (Ser217/221)                                 | Cell Signaling | 9121              |
| phosphor-SAPK/JNK (Thr183/Tyr185)                            | Cell Signaling | 9251              |
| phospho-Rac1/cdc42 (Ser71)                                   | Cell Signaling | 2461              |
| RASA5 (Ab1)                                                  | ThermoFisher   | PA1-046           |
| RASA5 (Ab2)                                                  | Epitomics      | 2477-S            |
| Rhodamine phalloidin                                         | Invitrogen     | R415              |
| Vimentin                                                     | Sigma-Aldrich  | V6630             |

## Reference

Jin, H., Wang, X., Ying, J., Wong, A.H., Cui, Y., Srivastava, G., Shen, Z.Y., Li, E.M., Zhang, Q., Jin, J., *et al.* (2007). Epigenetic silencing of a Ca<sup>2+</sup>-regulated Ras GTPase-activating protein RASAL defines a new mechanism of Ras activation in human cancers. *Proc Natl Acad Sci U S A* *104*, 12353-12358.

Ying, J., Li, H., Seng, T.J., Langford, C., Srivastava, G., Tsao, S.W., Putti, T., Murray, P., Chan, A.T., and Tao, Q. (2006). Functional epigenetics identifies a protocadherin PCDH10 as a candidate tumor suppressor for nasopharyngeal, esophageal and multiple other carcinomas with frequent methylation. *Oncogene* *25*, 1070-1080.
